1 **Title:** Glucose limitation in *Lactococcus* shapes a single-peaked fitness landscape exposing  
2 membrane occupancy as a constraint

3

4 **Authors:**

5 Claire E. Price<sup>a,b,c,1,2</sup>, Filipe Branco dos Santos<sup>c,d,e,2</sup>, Anne Hesselings<sup>a</sup>, Jaakko J. Uusitalo<sup>f</sup>,  
6 Herwig Bachmann<sup>c,d</sup>, Vera Benavente<sup>d</sup>, Anisha Goel<sup>c,d</sup>, Jan Berkhout<sup>d</sup>, Frank J. Bruggeman<sup>d</sup>,  
7 Siewert-Jan Marrink<sup>f</sup>, Manolo Montalban-Lopez<sup>a</sup>, Anne de Jong<sup>a</sup>, Jan Kok<sup>a</sup>, Douwe  
8 Molenaar<sup>c,d</sup>, Bert Poolman<sup>b</sup>, Bas Teusink<sup>c,d</sup>, Oscar P. Kuipers<sup>a,c</sup>

9

10 **Author affiliations:**

11 <sup>a</sup> Molecular Genetics group, University of Groningen, Nijenborgh 7, 9747 AG Groningen, the  
12 Netherlands

13 <sup>b</sup> Department of Biochemistry, University of Groningen, Nijenborgh 4, 9747 AG Groningen,  
14 the Netherlands

15 <sup>c</sup> Kluyver Center for Genomics of Industrial Fermentations/NCSB, Julianalaan 67, 2628 BC  
16 Delft, The Netherlands

17 <sup>d</sup> Systems Bioinformatics, Faculty of Earth and Life Sciences, VU University Amsterdam, De  
18 Boelelaan 1085, 1081 HV Amsterdam, The Netherlands

19 <sup>e</sup> Molecular Microbial Physiology Group, Faculty of Life Sciences, Swammerdam Institute of  
20 Life Sciences, University of Amsterdam, Science Park 904, Amsterdam 1098 XH,  
21 Netherlands

22 <sup>f</sup> Molecular Dynamics group, University of Groningen, Nijenborgh 7, 9747 AG Groningen,  
23 the Netherlands

24

25 **Author footnotes:**

26 <sup>1</sup> Current address: DSM Biotechnology Centre, Alexander Fleminglaan 1, 2613 AX, Delft,  
27 the Netherlands

28 <sup>2</sup> Both authors contributed equally

29 <sup>3</sup> Current address: Chr. Hansen, Boege Allé 10-12, 2970 Hoersholm, Denmark

30

31

32 **Corresponding authors:** [b.teusink@vu.nl](mailto:b.teusink@vu.nl) and [o.p.kuipers@rug.nl](mailto:o.p.kuipers@rug.nl)

33

34 **Keywords:** evolution, systems biology, lactic acid bacteria, resource allocation

35

## 36 **ABSTRACT**

37 A central theme in biology is to understand the molecular basis of fitness: which strategies  
38 succeed under which conditions; how are they mechanistically implemented; and which  
39 constraints shape trade-offs between alternative strategies. We approached these questions  
40 with parallel bacterial evolution experiments in chemostats. Chemostats provide a constant  
41 environment with a defined resource limitation (glucose), in which the growth rate can be  
42 controlled. Using *Lactococcus lactis*, we found a single mutation in a global regulator of  
43 carbon metabolism, CcpA, to confer predictable fitness improvements across multiple growth  
44 rates. *In silico* protein structural analysis complemented with biochemical and phenotypic  
45 assays, show that the mutation reprograms the CcpA regulon, specifically targeting  
46 transporters. This supports that membrane occupancy, rather than biosynthetic capacity, is the  
47 dominant constraint for the observed fitness enhancement. It also demonstrates that cells can  
48 modulate a pleiotropic regulator to work around limiting constraints.

49

## 50 **INTRODUCTION**

51 Many microorganisms have a remarkable versatility to adapt to different environments, either  
52 at the short time scale through signaling and gene expression networks, or at an evolutionary  
53 time scale through genomic adaptations to selective pressures. A key question in  
54 (micro)biology, is how specific selective pressures shape molecular strategies, how evolvable  
55 they are, and which constraints and resulting trade-offs in phenotypic traits are relevant under  
56 what condition.

57 In recent years a number of studies (Dekel and Alon, 2005; Molenaar *et al.*, 2009; Scott *et al.*,  
58 2010, 2014) pointed towards cellular resource limitations, born from environmental

59 (nutritional) constraints but also from intrinsic kinetic and physicochemical constraints, as  
60 main forces for regulatory strategies. These relate to the role of protein costs in particular,  
61 and how the need for ribosomal protein synthesis capacity requires growth-rate dependent  
62 regulation of the proteome (Scott *et al.*, 2010). Although these concepts can explain many  
63 regulatory phenomena, such as catabolite repression (Görke and Stülke, 2008) and overflow  
64 metabolism (Basan *et al.*, 2015), it remains to be demonstrated (i) to what extent such  
65 strategies require optimality or are optimal solutions to the resource allocation problem; (ii)  
66 what exactly the constraints are that govern the resource allocation; (iii) what the regulatory  
67 mechanisms are that result in proteome re-allocation; and (iv) whether these concepts apply  
68 to microorganisms other than *E. coli* – the organism for which these concepts have been  
69 largely developed and experimentally tested.

70 We have recently challenged the view that protein costs play a role in metabolic switches in  
71 the lactic acid bacterium *Lactococcus lactis*: we found a switch from mixed acid fermentation  
72 to homolactic fermentation (an anaerobic variant of the Crabtree effect) in the absence of  
73 proteome alterations (Goel, Eckhardt, Puri, Jong, Branco dos Santos, Giera, Fusetti, Vos,  
74 Kok, Poolman, Molenaar, Kuipers and Teusink, 2015). One explanation was that this  
75 bacterium might not display optimal behaviour in the chemostat in which they were  
76 cultivated. This primed us to do laboratory evolution experiments as they offer unique  
77 opportunities for the testing of adaptive strategies, whilst monitoring evolving populations  
78 under well-defined conditions.

79 Laboratory evolution of microorganisms can be carried out under a broad range of selective  
80 pressures, such as varying growth rate in serial batch cultures (Bachmann *et al.*, 2012; Wisser,  
81 Ribbeck and Lenski, 2013), antibiotic resistance in different cultivation settings (Lázár *et al.*,  
82 2013), growth rate under nutrient limitation in chemostats (Gresham and Hong, 2014), cell  
83 number in emulsion-based systems (Bachmann *et al.*, 2013), and growth rate in dynamic

84 environments (Meadows *et al.*, 2010). However, to study the role of limited resource  
85 allocation on adaptive strategies, at different growth rates and evolutionary time scales, the  
86 chemostat is perfect (Gresham and Hong, 2014). It allows for full control over the nature of  
87 the resource limitation and the growth rate, and provide a constant, steady-state environment.  
88 We studied microbial evolution of *Lactococcus lactis* in highly-standardized glucose-limited  
89 chemostats at two different dilution rates with four replicates each. We found the exact same  
90 residue of a pleiotropic regulator to be mutated in all of these experiments, and confirm the  
91 fitness-enhancing effect of this mutation in chemostat competition experiments at other  
92 dilution rates as well. Detailed characterization of the biochemical and phenotypical  
93 consequences of the mutation demonstrated a reprogramming of the regulatory logic of the  
94 regulator, by inducing the suppression of alternative carbon uptake systems under low  
95 glucose levels whilst maintaining the –otherwise similarly regulated- high affinity glucose  
96 transporter. The occurrence of one dominant mutation suggests a single-peaked fitness  
97 landscape and shows that the dominant constraint under such chemostat conditions is not  
98 cytosolic protein synthesis costs, but rather membrane occupancy. We thus experimentally  
99 confirm and extend previous computational studies in *E coli* (O’Brien *et al.*, 2013) which  
100 suggested the action of different constraints (nutrient limitation and proteome limitation)  
101 under different conditions. While doing so, we provide a full mechanistic mapping from  
102 mutation to regulation to fitness.

103

## 104 **RESULTS**

105 *Chemostat and cultivation design for long-term microbial evolution under stable*  
106 *environmental conditions*

107 Until now, microbial evolution in chemostats has been rather limited by the number of  
108 replicates and by the number of generations, *i.e.* volume changes. Initially described as a

109 device that could continuously cultivate bacteria for an indefinite period of time (Novick and  
110 Szilard, 1950), to date the longest published cultivation using a chemostat is only a few  
111 hundred generations (Gresham and Hong, 2014). This is several orders of magnitude shorter  
112 than the longest serial batch cultivation experiments – 50,000 generations and counting  
113 (Wiser, Ribbeck and Lenski, 2013). To address the failure of long-term continuous cultivation,  
114 we developed a versatile bioreactor cap and experimental set-up to perform parallel,  
115 prolonged cultivations under chemostat conditions, at small working volumes (detailed in  
116 Supplementary Materials and Figure 1). These advances allowed us to conduct experiments  
117 in quadruplicate for more than 1000 consecutive generations.

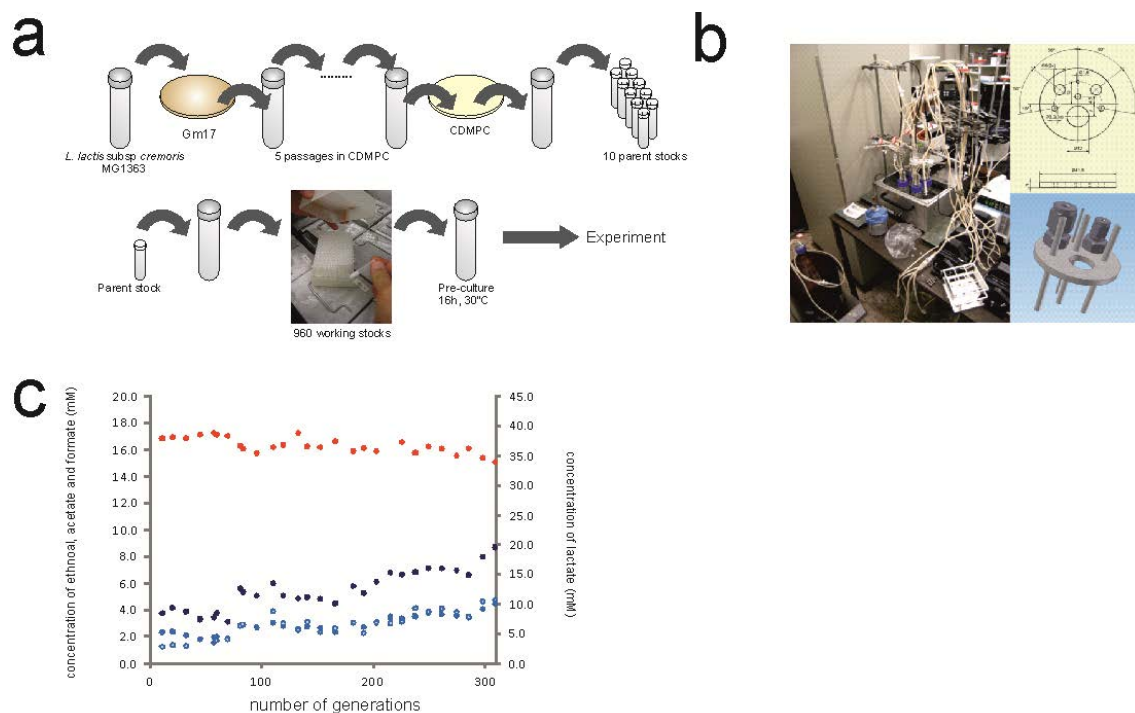

118

119

120 **Figure 1.** (a) Standardized cryopreservation procedure to minimize strain variability among  
121 experiments. GM17: M17 medium supplemented with 25 mM glucose, CDMPC: chemically  
122 defined medium for prolonged cultivation. (b) Miniaturized chemostat set up to allow  
123 prolonged cultivation experiments in parallel and (c) the online measurements of organic  
124 acids for strain 309C1 taken during the evolution experiments at D of 0.5 h<sup>-1</sup> showing lactate  
125 (red), formate (dark blue), acetone (blue) and ethanol (light blue).

126

127

128 Additionally, a requirement of laboratory evolution is that sources of technical variability  
129 between replicates are minimized. Our initial focus was set on carefully defining the  
130 cultivation conditions (chemostat and medium) and on standardizing experimental procedures  
131 (inoculation, sampling, and cell storage). We developed a chemically defined medium  
132 particularly suited for prolonged cultivation (CDMPC) based on the nutrient requirements  
133 (Jensen and Hammer, 1993) and biomass composition of *L. lactis* MG1363 (Oliveira, Nielsen  
134 and Förster, 2005) (detailed in supplementary materials). To reduce inoculum variability we  
135 implemented a strictly controlled cryopreservation and inoculation procedure (Figure 1 and  
136 detailed in Supplementary Materials).

137 The cultivation history of bacterial strains is of utmost importance. Strains can rapidly  
138 deviate from their original genotype, which can lead to noticeable phenotypic differences  
139 (Linares, Kok and Poolman, 2010; Bachmann *et al.*, 2012). Our initial inoculum came from  
140 the original *L. lactis* MG1363 sequenced stock (Linares, Kok and Poolman, 2010). Since our  
141 newly designed medium could potentially lead to the selection of new genotypes, we  
142 performed a short-term serial batch adaptation of this strain to the medium CDMPC. The  
143 resulting single isolate picked (Genr0) was cryopreserved and used as the seeding population  
144 for all the laboratory evolution experiments performed.

#### 145 *Parallel laboratory evolution in chemostat cultures*

146 We exposed *L. lactis* MG1363 to parallel chemostat cultivations: Genr0 was cultivated  
147 continuously in quadruplicate, each using 60 mL glucose-limited chemostats at a growth rate  
148 of  $0.5\text{h}^{-1}$  for over 300 volume changes. Culture samples were harvested periodically every  
149 10-15 generations from the effluent to determine cell density and the fluxes of fermentation  
150 substrates and products (an example is given in Figure 1C). Cell samples were stored as  
151 glycerol stocks at  $-80^{\circ}\text{C}$  to be used as snapshots of the evolutionary process.

152 Throughout the prolonged cultivation, all four replicates (referred hereon as 309C1 through  
153 309C4) displayed very similar behavior. Biomass concentration did not vary significantly  
154 indicating that biomass yield on substrate remained fairly constant (Supplementary Figure 1).  
155 *L. lactis* can catabolize glucose through homolactic or mixed acid fermentation, excreting,  
156 respectively, lactate, or acetate, formate and ethanol (Thomas, Ellwood and Longyear, 1979).  
157 At a dilution rate of  $0.5 \text{ h}^{-1}$ , Genr0 produces mainly lactate (lactate:acetate ratio  $\sim 16$ ).  
158 Throughout the course of the experiment, all parallel reactors shifted gradually towards  
159 mixed acid fermentation leading to a ratio of approximately 7. Despite the fact that this  
160 fermentative mode leads to a theoretical 50% increase in ATP yield, the biomass  
161 concentration did not change. The latter can be explained by the observation that the evolved  
162 cells also gradually excreted more pyruvate, the final shared precursor of the homolactic and  
163 the mixed acid fermentative pathways (Supplementary Figure 1).  
164 When evolved cells were grown on glucose in batch, we observed differences with Genr0 in  
165 the maximal growth rate ( $\mu_{\max}$ ), length of the lag phase and sedimentation. We compared to  
166 Genr0 both the population samples collected after 309 generations and single colony isolates  
167 from the evolved population samples (Supplementary Figures 1 and 6). Irrespective of  
168 whether the evolved populations or the isolates were compared, they were clearly  
169 outperformed by Genr0 in batch. Most notably,  $\mu_{\max}$  dropped to a value close to the dilution  
170 rate at which cells were evolved, which falls nearly 25% below the  $\mu_{\max}$  of the parent strain.  
171 The evolved strains also exhibited extended lag phases and sedimentation during batch  
172 cultivations. The sedimentation was reminiscent of the *AcmA*-deficient phenotype previously  
173 described (Buist *et al.*, 1995).

#### 174 *Identification of the mutations arising during the evolutionary experiment*

175 We sequenced single-colony isolates from the original strain stock of Genr0 and from the end  
176 of the four replicate evolution experiments performed at a dilution rate of  $0.5 \text{ h}^{-1}$  (*i.e.* 309C1,

177 309C2, 309C3, 309C4). The published whole genome sequence for *L. lactis* MG1363  
178 (Linares, Kok and Poolman, 2010) was used as a reference for sequence assembly. Mutations  
179 were identified and verified by Sanger sequencing (Supplementary Table 2). In comparison  
180 with Genr0, we found SNPs unique to the evolved strains (Figure 2). The number of SNPs  
181 accumulated per genome was between one (309C1) and six (309C4). This corresponds to a  
182 mutation rate of 1.3 to 7.8 x 10<sup>-9</sup> (per base pair per generation) and is in line with currently  
183 published estimates (Barrick *et al.*, 2009).  
184

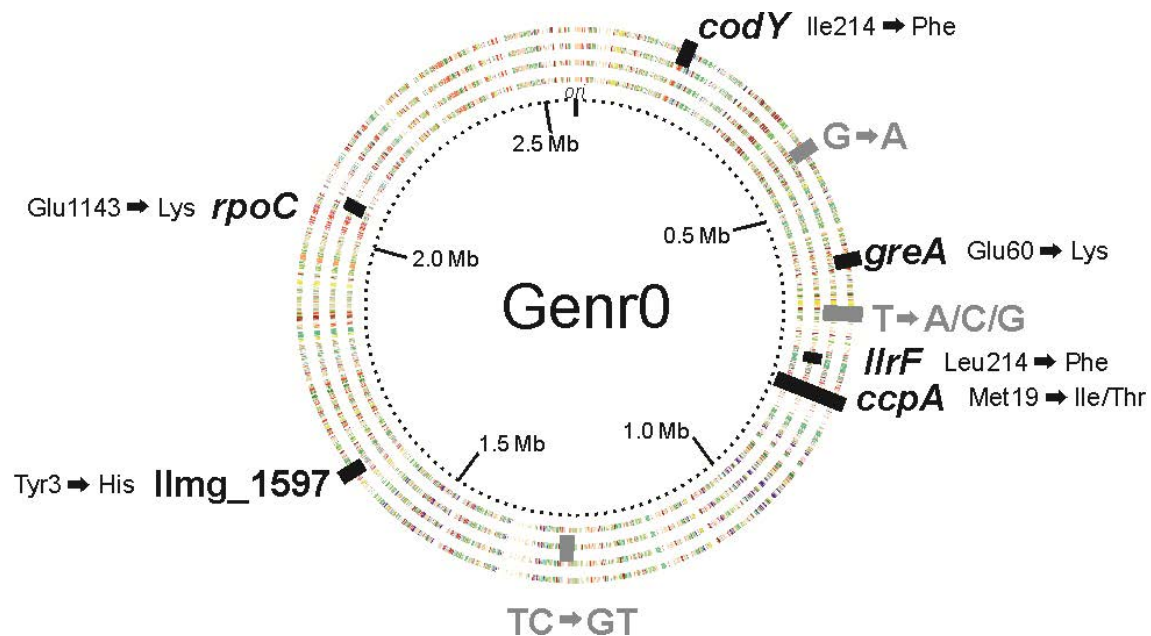

186 **Figure 2. Mutations identified in the 4 evolved strains compared to the original strain**  
187 **Genr0.** The genes and intergenic regions with SNP mutations are shown. For coding regions  
188 (in black) the resulting amino acid substitution is indicated. The dotted inner ring indicates  
189 the genome position. The rings are color-coded according to the COG-classification of the  
190 gene present on the forward and reverse strands, and from inner to outer ring we represent  
191 evolved strains 309C1 to C4.  
192  
193



194 All of the SNPs in the coding regions were non-synonymous (more details in Supplementary  
195 Materials), and strikingly, all strains accumulated a mutation in the codon coding for Met19  
196 in the global transcriptional regulator CcpA of Genr0. At the DNA level, the mutations  
197 differed between the evolved strains. In strains 309C1, 309C2, and 309C3, ATG was mutated  
198 to either ATA or ATC, resulting in the amino acid change from Met to Ile. In none of the  
199 sequencing experiments performed for cells cultured at a D of  $0.5\text{h}^{-1}$  was the Ile codon ATT  
200 identified (see also section on *Dynamics of Evolution Experiments*). For strain 309C4 the  
201 ATG codon was mutated to ACG resulting in a Met to Thr change. Strains 309C2, 309C3 and  
202 309C4 contain a few additional mutations, while the isolate of 309C1 only contains the SNP  
203 in *ccpA*. Since 309C1 exhibits very similar phenotypes to those of the other strains, this  
204 mutation must be sufficient to confer a growth advantage to the evolved strains when  
205 compared to Genr0, and to a great extent be the genetic basis of the common phenotypic  
206 differences observed. These include the growth kinetics and sedimentation phenotype  
207 (Supplementary Figures 1 and 6) and, as addressed below, altered glucose utilization kinetics.  
208 The sequences were also analyzed for insertions and/or deletions and when compared to the  
209 Genr0 sequence; the evolved strains showed no major frameshifts (see Supplementary Table  
210 2).

### 211 *Effect of CcpA M19I on global gene expression patterns*

212 The evolved strains were revived in CDMPC and grown until mid-exponential phase at  
213 which point microarray analyses were performed (Kuipers *et al.*, 2002). Gene expression in  
214 the evolved strains was compared to that of Genr0. Evolved strain 309C1, which contains  
215 only the SNP in *ccpA*, showed an altered gene expression dominated by genes involved in  
216 membrane transport, especially carbohydrate import (Supplementary Figure 3,  
217 Supplementary Table 3, Supplementary Table 4). CcpA controls the preferential use of  
218 glucose over other sugars (Deutscher, Francke and Postma, 2006) and regulon analysis of the

219 differentially expressed genes revealed that CcpA-regulated genes were indeed over-  
 220 represented in the data set.

221 *L. lactis* contains three glucose import systems – two phosphotransferase systems, PTS<sup>Man</sup>  
 222 and PTS<sup>Cel</sup>, and a glucose facilitated diffusion system (Castro *et al.*, 2009) – and expression  
 223 of the genes encoding the high affinity PTS<sup>Man</sup> were up-regulated compared to the original  
 224 strain, while those encoding the low affinity PTS<sup>Cel</sup> were down-regulated (Figure 3A). The  
 225 effects of these gene expression changes were investigated further by monitoring the uptake  
 226 of <sup>14</sup>C-glucose in whole cells. In accordance with the sequencing and gene expression data,  
 227 *i.e.* the glucose transporters themselves are not mutated but rather their expression is  
 228 changed: the rate at which glucose was taken up by the cells was increased nearly 3-fold in  
 229 the evolved strain, while the apparent Michaelis constant for glucose was unchanged (Figure  
 230 3B).

231

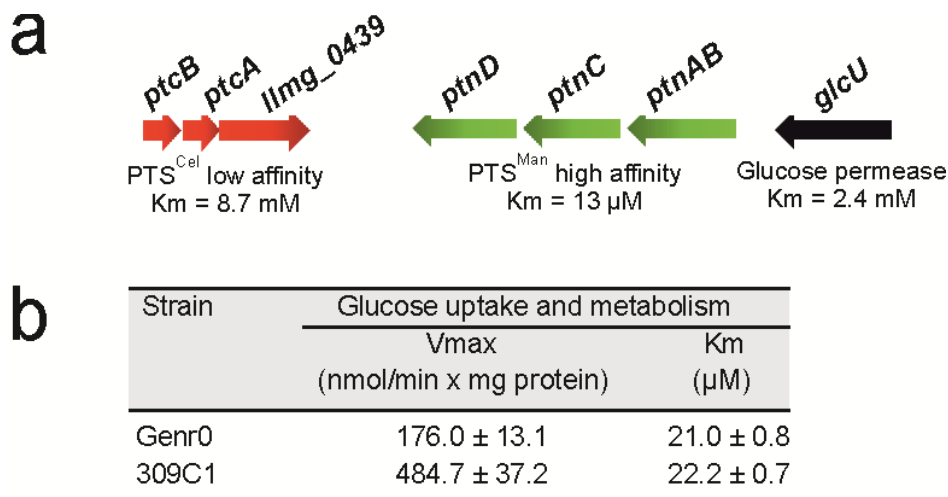

232

233 **Figure 3. Altered gene expression in strain 309C1 is focused on transport pathways.** (a)  
 234 The expression of genes involved in glucose uptake in *L. lactis* MG1363 was significantly  
 235 changed in the evolved strains. Highlighted in green are genes that were up-regulated and in  
 236 red those that were down-regulated. (b) Kinetic parameters of glucose transport in Genr0 and  
 237 strain 309C1 were determined in cells grown to exponential phase in CDMPC. Glucose  
 238 transport was assayed with [<sup>14</sup>C]-labeled glucose. Values of three independent experiments  
 239 were averaged and are reported ±SD. V<sub>max</sub> and K<sub>m</sub> were determined using glucose  
 240 concentrations from 1.2 to 200 μM (Gouridis *et al.*, 2015).

241

242 The ability to utilize other carbon sources was diminished for the evolved strains  
243 (Supplementary Figure 4A). This coincided with the down regulation of, amongst others,  
244 genes encoding for maltose transporters, ABC sugar importers and sugar utilization enzymes  
245 (Supplementary Table 3), many of which are CcpA-regulated.

246 In general, CcpA is a versatile global regulator that can act as a transcriptional repressor or  
247 activator. An amino acid substitution in the DNA binding region may therefore have  
248 qualitatively different effects at different target promoters. This is indeed what we observe:  
249 15 CcpA-regulated genes are down regulated, 6 are up-regulated, while 11 remain  
250 unchanged. We next examined the molecular basis of the differential effects on expression.

#### 251 *Effect of M19I mutation on the binding affinity of CcpA*

252 Met19 is located in the second helix of the DNA-binding domain and is highly conserved in  
253 CcpA (Figure 4A and Supplementary Figure 8). *L. lactis* CcpA binds to *cre* sites for which  
254 the consensus sequence is known: TGNNANCGNTTCA. Sequence analysis revealed that  
255 putative *cre* sites upstream down-regulated genes were closest to the *cre* consensus sequence,  
256 while up-regulated genes deviated and were less likely to have both C7, G8 and C13 but  
257 always T10 (Figure 4B). We tested this further by analyzing CcpA with either Met or Ile or  
258 Thr at position 19 and a select number of *cre* site sequences in *in vitro* binding assays and  
259 molecular dynamic simulations.

260 For all 4 *cre* sites tested *in vitro*, the CcpA-Ile19 variant showed an increase in binding  
261 affinity for the DNA operators selected (Figure 4D and Supplementary Figure 10). This was  
262 most pronounced for the sequence upstream of *ptcB* and least pronounced for *mtlD*. To  
263 complement the binding assays, molecular dynamic simulations were performed. This  
264 allowed us to determine the relative binding free energy of the CcpA variants to a similar set  
265 of DNA operators (Figure 4C, Supplementary Figure 9).

266

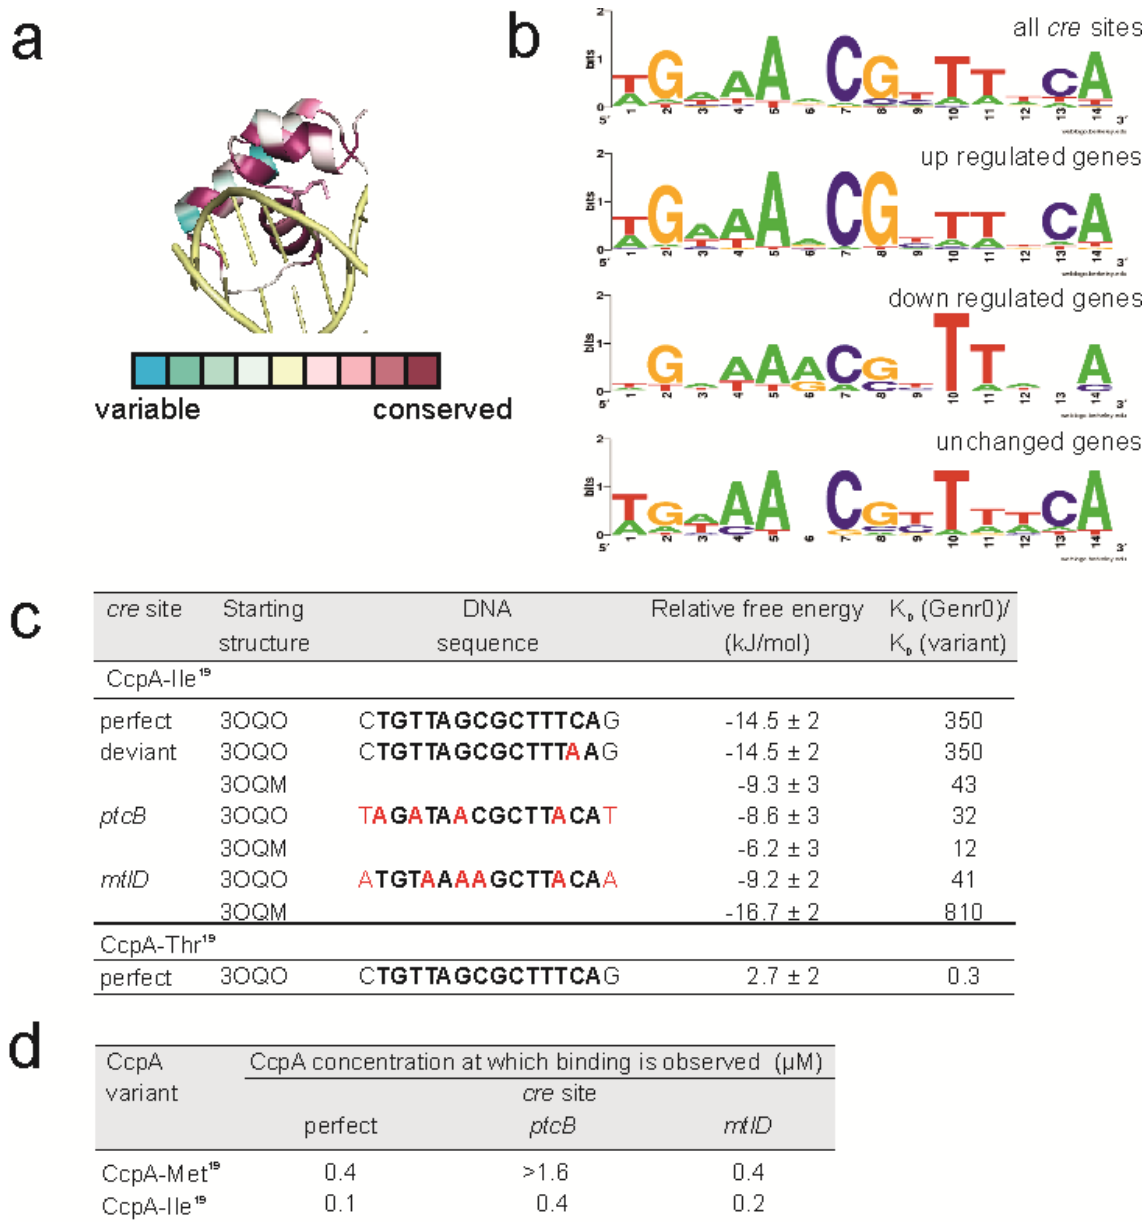

267

268 **Figure 4. Mutations in *ccpA* result in increased binding affinity for certain *cre* sites.**  
 269 Mutations in the Met<sup>19</sup> codon in the DNA binding domain of CcpA alter the binding affinity  
 270 of CcpA for certain *cre* sites. (a) View of the DNA-binding domain with the side chain of  
 271 Met19. Using ConSurf 2010 (Ashkenazy *et al.*, 2010) and the *B. subtilis* CcpA-HPr complex  
 272 bound to a synthetic *cre* site (3OQN) as a starting structure, the level of amino acid sequence  
 273 conservation amongst LacI transcriptional regulators was analyzed. CcpA is colored  
 274 according to the level of conservation within the LacI family of transcriptional regulators,  
 275 while the DNA is colored yellow. Dark purple indicates 100% conservation, while blue  
 276 indicates extensive sequence variation. (b) Sequence logo diagrams representing the  
 277 abundance and position of nucleotides in the CcpA-regulated genes of *L. lactis* MG1363. (c)  
 278 Changes in relative binding free energy upon substitutions at Met19 in CcpA as calculated by  
 279 molecular dynamics. The reported errors of the relative free energies are standard errors of  
 280 the mean. (d) Binding of CcpA to *cre* sites *in vitro*. The binding of CcpA-Met<sup>19</sup> and CcpA-  
 281 Ile<sup>19</sup> was tested with DNA sequences identified as *cre* sites upstream of *ptcB* and *mtlD* as

282 well as a perfect *cre* site. As a negative control the CodY recognition site upstream of *oppD*  
283 was also tested (See also Supplementary Figure 10).

284

285 The effect of either the Ile or Thr substitution at position 19 was first investigated by  
286 calculating the relative binding free energies of CcpA to a canonical *cre* site (Schumacher *et*  
287 *al.*, 2011). The Ile variant had a more negative free energy of binding as compared to the wild  
288 type protein, whereas the Thr variant did not exhibit significantly different binding to the  
289 wild type protein. We then tested the effect of the DNA sequence on the binding free energy  
290 for wild type and evolved CcpA, using structures derived from CcpA bound to two different  
291 *cre* site sequences (3OQO and 3OQM) (Schumacher *et al.*, 2011). When the Ile was present  
292 at position 19, tighter binding to all DNA sequences tested was computed, irrespective of the  
293 starting structure used.

#### 294 *Population dynamics of prolonged cultivation experiments*

295 The frozen population stocks, collected periodically throughout the prolonged cultivations,  
296 served as snapshots of the adaptive evolution process to the chemostat environment. By  
297 determining the abundance of the CcpA-Ile19 variant in stocks collected at different  
298 generations, we were able to unravel the wash-in dynamics that outcompeted the native  
299 CcpA-Met19. Quantification was carried out using pyrosequencing of the region containing  
300 the SNP in the *ccpA* locus. The CcpA-Ile19 variant emerged after 50 generations in the  
301 evolved populations and became dominant already by generation 150 (Supplementary Figure  
302 11). While Met is encoded by ATG, Ile can be encoded by ATA, ATC or ATT. However,  
303 only the first two codons were identified in the  $D=0.5 \text{ h}^{-1}$  evolution experiment, with the  
304 ATA mutant emerging prior to ATC (Supplementary Figure 12). At generation 309, when the  
305 experiment was stopped, over 97% of the population carried the CcpA-Ile19 variant.

306 We then tested whether the phenotypic changes imposed by the CcpA mutation would be  
307 sufficient to explain the wash-in kinetics observed using the glycerol stocks. For this purpose,  
308 a simple model of chemostat growth with two competing strains was used to simulate the

309 prolonged experiment at a  $D$  of  $0.5\text{h}^{-1}$ . The model was able to accurately fit the observed  
310 population dynamics, suggesting that the underlying mechanism can be fully understood in  
311 terms of chemostat wash-in kinetics and is attributable to the mutant CcpA regulator  
312 (Supplementary Figures 13A-C). Sensitivity analysis of this model showed that two pairs of  
313 parameters cannot be estimated independently, only their ratios (Supplementary Figures 13D-  
314 E). These are (i) the Monod constants ( $K_s$ ) of the parent (Genr0) and the evolved (309C1-C4)  
315 strains and (ii) the biomass yield of the parent strain and the emergence frequency of the fitter  
316 strain. This uncertainty has, however, no implications for the conclusions derived from the  
317 model. Another important aspect emerged from analyzing the model: the cells evolved at a  
318  $D=0.5\text{h}^{-1}$  are predicted to outcompete Genr0 at any constant dilution rate not higher than  $\mu_{\max}$ .  
319 *Parallel laboratory evolution and competition experiments under chemostat conditions at*  
320 *different dilution rates*

321 We next addressed whether the fitness effect of the CcpA-Ile19 variant is dependent on  
322 growth rate. We performed new evolution experiments in the chemostat environment at a  
323 dilution rate of  $0.6\text{h}^{-1}$ , since at a  $D$  closer to  $\mu_{\max}$  ( $\sim 0.67\text{h}^{-1}$ ), the concentration of limiting  
324 nutrient becomes higher (Goel, Eckhardt, Puri, Jong, Branco dos Santos, Giera, Fusetti, Vos,  
325 Kok, Poolman, Molenaar, Kuipers and Teusink, 2015), hence modulating the strength of the  
326 selection pressure applied. Experiments were carried out for as many as 800 volume changes,  
327 in a similar fashion as was done for the  $D$  of  $0.5\text{h}^{-1}$ . Sanger sequencing of the *ccpA* locus  
328 from fragments, obtained by PCR using the frozen stocks as templates, indicated that indeed  
329 the CcpA-Ile19 substitution was washing in as predicted by the model. Re-sequencing of the  
330 whole-genome of single isolates of each of the populations evolved at  $0.6\text{h}^{-1}$  revealed that  
331 once again the only mutation that was consistent across all isolates was located in residue 19  
332 of CcpA. This time all possible codons that encode Ile were found, suggesting that the amino  
333 acid substitution is the only factor that confers a strong fitness benefit.

334 We further tested whether the same mutation is also advantageous for dilution rates that are  
335 far lower than  $\mu_{\max}$  by performing competition experiments in chemostats between Genr0 and  
336 309C1 (harboring only the CcpA-Met19 mutation). We used our growth model parameterized  
337 with the data from the evolution experiments at a  $D$  of  $0.5\text{h}^{-1}$ , to simulate the population  
338 dynamics of competition experiments carried out at a  $D$  of  $0.2$  and  $0.3\text{h}^{-1}$  (Figure 5). Based on  
339 this, we designed and performed the experiments, in which a small fraction ( $\sim 10\%$ ) of cells  
340 from a steady-state culture of 309C1 were mixed with a steady-state culture of Genr0  
341 maintained at the same  $D$ . The population dynamics of these mixed cultures were monitored  
342 in time by collecting samples from the culture effluent, and determining relative fractions  
343 using pyrosequencing as before. We found an excellent agreement between experimental data  
344 and model simulations (Figure 5), indicating that the fitness benefit of the CcpA-Met19  
345 mutation is growth-rate independent.

346

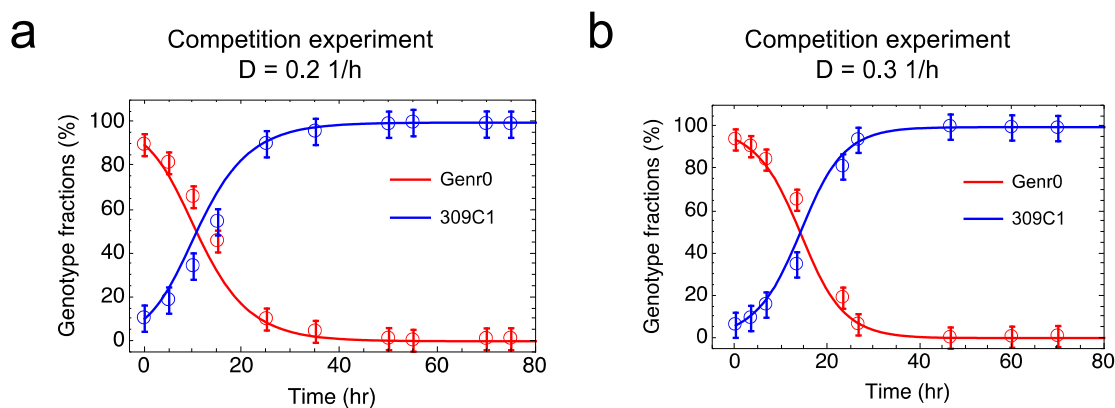

347

348 **Figure 5. Chemostat competition experiments.** Experiments were carried out between  
349 Genr0 (red) and 309C1 (blue) at a dilution rate of  $0.2\text{ h}^{-1}$  (panel a) and  $0.3\text{ h}^{-1}$  (panel b).  
350 Marks represent averages and standard deviations based on experimental data. Line depicts  
351 results from *in silico* simulations using the model presented here parameterized based on the  
352 population dynamics observed during the evolution experiments at a  $D = 0.5\text{ h}^{-1}$   
353 (Supplementary Figure 13).

354

355

356 **DISCUSSION**

357 *Replicate chemostats show high evolvability and low plasticity*

358 We studied the molecular mechanism of the adaptive strategy employed by *L. lactis* during  
359 growth in a glucose-limited chemostat. In this way, we kept the identity of the selective  
360 pressure constant, but varied its strength by imposing different dilution rates. Miniature  
361 chemostats were constructed and growth medium and protocols developed that allowed  
362 highly standardized, parallel and stable conditions for evolutionary studies in quadruplicate  
363 for hundreds of consecutive generations, providing true biological replicates of this early  
364 evolutionary process.

365 Intriguingly, we found rapid fixation of exactly the same beneficial amino-acid substitution  
366 across all parallel evolutionary experiments, independent of growth rate. This demonstrates a  
367 high evolvability with low evolutionary plasticity under these conditions. Evolutionary  
368 plasticity is related to the existence of alternative mutations that give rise to a comparable  
369 fitness enhancement for a particular selective pressure (Snell-Rood *et al.*, 2010; Forsman,  
370 2014). Plasticity is high when many alternatives exist. Evolvability considers the rate of  
371 evolution. It is both related to the number of mutations required, and their fixation rate, to  
372 reach a specific quantitative change in fitness. If several mutations are required in sequence  
373 for a specific quantitative change in fitness then evolvability is low, and vice-versa.  
374 Evolvability can be assessed by determining the number of generations that it takes fitter  
375 mutants to fix (Colegrave and Collins, 2008; Pigliucci, 2008). High plasticity and high  
376 evolvability occur when alternative mutants fix at similar rates. High evolvability can also  
377 occur at low plasticity: then one mutation fixes across replicates and dilution rates. The latter  
378 was clearly the case in our study, and it appears that there is a single-peaked fitness  
379 landscape, suggesting a strong preference for this specific mechanism, independent of the



380 strength of the selection pressure. As we will discuss shortly, our data suggest that alleviating  
381 constraints on membrane occupancy may be that mechanism.

382 *Mutation in a global regulator rather than specifically in a glucose transporter*

383 In the chemostat, fitter mutants outgrow their competitors because they can grow at a rate  
384 equal to the dilution rate, but at a lower concentration of the limiting nutrient (Gresham and  
385 Hong, 2014; Bachmann *et al.*, 2016; Wortel *et al.*, 2016). So, in glucose-limited chemostats,  
386 one expects enhanced selective pressure toward increased efficiency of glucose uptake, which  
387 could be achieved by mutating or elevating the expression of high-affinity transport systems,  
388 as previously observed (Bachmann *et al.*, 2012; Solopova *et al.*, 2012). However, although  
389 glucose transport activity did increase, we found a mutation with pleiotropic effects in the  
390 global carbon metabolism regulator CcpA, rather than in any of the three glucose  
391 transporters.

392 The DNA binding domain of CcpA is highly conserved and in natural isolates of *L. lactis*, as  
393 well as in CcpA homologues of other Gram-positive organisms such as *B. subtilis*, the Met  
394 residue is present at an equivalent position. Based on the high-resolution structures of CcpA  
395 from *B. subtilis*, this residue directly interacts with the nucleobases in the  
396 *ackA2* and *glnR* promoter sequences but not with the synthetic *cre* site (Schumacher *et al.*,  
397 2011). Whether CcpA binds with a higher or lower affinity to certain *cre* sites has been  
398 investigated in *B. subtilis* (Marciniak *et al.*, 2012). While the focus was on the *cre* site  
399 sequence itself, our study gives insights into the effect of the CcpA amino acid sequence on  
400 DNA binding. The direct-binding data show that the effect of the amino acid substitution  
401 consistently results in a tighter binding of CcpA to *cre* sequences, although not always to the  
402 same extent. Other factors such as distance of the *cre* site to the transcriptional start site,  
403 and/or the presence of other transcriptional regulators governing the expression of the operon  
404 are known to affect gene expression (Deutscher, Francke and Postma, 2006). The different

405 extent of tighter binding of the evolved CcpA, in conjugation with the different regulatory  
406 effects that CcpA may adopt for different operons, results in the reprogramming of the this  
407 regulon, particularly around membrane proteins (underlying reasons are addressed below).  
408 This allows the overall fine-tuning rather than the optimization of a particular trait (e.g.  
409 increasing Ks of a single transporter), in response to imposed selection pressure.

410 CcpA was not the only global regulator to accumulate mutations. We also found a Phe  
411 substitution for Ile<sup>214</sup> in the DNA binding domain of CodY, a global regulator of nitrogen  
412 metabolism in *L. lactis*. This mutation was only found in one chemostat but, similar to the  
413 mutation accumulated in *ccpA*, indicates a strategy of modulation of global gene expression  
414 in response to the culture conditions.

#### 415 *Fitness enhancement independent from growth rate requires phenotypic plasticity*

416 The fact that we find a single mutation and that we can capture the population dynamics of  
417 the CcpA-Met19 allele wash-in at different dilution rates with a simple growth model with  
418 fixed kinetics, shows that the mechanism underlying the adaptation to a constant glucose-  
419 limiting environment is independent of the growth rate. Yet different growth rates do require  
420 different fluxes of glucose uptake, catabolism and biosynthesis. In view of the prevailing  
421 perspective of growth-rate dependent regulation of the proteome, including global regulatory  
422 mechanisms that may depend on this flux (Kotte, Zaugg and Heinemann, 2010; Basan *et al.*,  
423 2015), this is far from trivial. This seems only possible if the cells possess a form of non-  
424 genetic phenotypic plasticity that tolerates the adjustment of the gene-regulatory circuitry  
425 under different conditions. A recent functional genomics study of the parent Genr0 strain at  
426 different growth rates – using the same standard cultivation conditions – indeed suggests that  
427 regulation at the metabolic level is the dominant form of phenotypic plasticity (Goel,  
428 Eckhardt, Puri, Jong, Branco dos Santos, Giera, Fusetti, Vos, Kok, Poolman, Molenaar,  
429 Kuipers and Teusink, 2015), *i.e.* the proteome of *L. lactis* hardly changed in the wide range of

430 growth rates also studies here ( $0.2 - 0.6 \text{ h}^{-1}$ ). The presence of such metabolic phenotypic  
431 plasticity seems therefore a requirement for our finding of low genetic plasticity and high  
432 evolvability. It shows that the intracellular proteome does not impose major constraints on the  
433 organism under these conditions, but rather the proteome of the membrane, as we will discuss  
434 next.

435 *Reprogramming of gene expression hints at an important constraint at the level of membrane*  
436 *occupancy*

437 While the mutation in CcpA does increase the expression of genes for high affinity glucose  
438 PTS systems (e.g. PTS<sup>Man</sup>), it simultaneously downregulates the expression of unused  
439 membrane proteins such as transporters for other sugars and respiratory proteins. This dual  
440 role was shown experimentally to indeed result in evolved cells with a more efficient glucose  
441 uptake, and suggests that the most successful adaptation to constant glucose-limitation in *L.*  
442 *lactis* requires reprogramming of membrane occupancy, not only upregulation of the specific  
443 transporter. The idea that constraints related to limited resources and physicochemical  
444 properties affect evolutionary strategies and create trade-offs is much under debate in recent  
445 literature (Molenaar *et al.*, 2009; Scott *et al.*, 2014; Goel, Eckhardt, Puri, Jong, Branco dos  
446 Santos, Giera, Fusetti, Vos, Kok, Poolman, Molenaar, Kuipers, Teusink, *et al.*, 2015;  
447 O'Brien, Utrilla and Palsson, 2016). One interpretation of our data is that the down-regulation  
448 of membrane processes provides more membrane space for glucose transporters, in analogy  
449 with re-allocation of cytosolic proteins, as happens in *E. coli* under different growth  
450 conditions (Hui *et al.*, 2015).

451 Our results are consistent with a detailed computational study of *E. coli* that suggested the  
452 presence of different growth regimes with different constraints limiting growth rate (O'Brien  
453 *et al.*, 2013). At low growth rates, nutrient uptake was assumed to be the dominant constraint,  
454 and cytosolic protein machinery for growth is in excess; only at nutrient excess, internal

455 proteome constraints became dominant. Such excess of cytosolic proteins at sub-maximal  
456 growth can explain the predominantly metabolic regulation of flux under our conditions, and  
457 hence explains the required phenotypic plasticity (Goel, Eckhardt, Puri, Jong, Branco dos  
458 Santos, Giera, Fusetti, Vos, Kok, Poolman, Molenaar, Kuipers and Teusink, 2015). We thus  
459 provide an experimental case-study that suggests that indeed uptake constraints are the main  
460 constraint for fitness in the chemostat, and that global regulators may be able to overcome  
461 them, through pleiotropic effects.

462 In line with this, we found that the growth rate of the CcpA-Met19 mutant was lower than in  
463 wildtype when grown in batch (glucose excess), despite higher glucose uptake capacity -  
464 something that is rather common for microorganisms evolved to nutrient-limited conditions  
465 (Gresham and Hong, 2014). Also serial batch growth of *L. lactis* in emulsion- a method to  
466 select for high cell number - selected for a mutation in the glucose transporter itself, rather  
467 than in a regulator thereof (Bachmann *et al.*, 2013). In that case, the mutation reduced  
468 glucose transport activity, thereby mimicking a low-glucose environment associated with  
469 acetogenic metabolism, a high ATP-yield strategy.

470 In conclusion, our work shows that evolution to constant growth conditions can be mediated  
471 by global regulators such as the carbon catabolite protein CcpA. Metabolic engineering  
472 through the mutation of global regulators was first demonstrated by Stephanopoulos and  
473 coworkers (Moxley *et al.*, 2009). We here show that the subtle manipulation of global  
474 regulators to change entire metabolic networks is a strategy already employed by nature.

475

## 476 **MATERIAL AND METHODS**

477 ***Bacterial strains, media and growth conditions*** - *Lactococcus lactis* subsp. *cremoris*  
478 MG1363 was grown in a chemically defined medium developed for prolonged cultivation,  
479 CDMPC (Supplementary Table 1). The major differences compared to previously published

480 chemically defined media for *L. lactis* (Thomas, Ellwood and Longyear, 1979; Poolman and  
481 Konings, 1988; Jensen and Hammer, 1993) are (i) the implementation of standardized  
482 procedures that reduce variations between media batches, (e.g. safeguarding solubility); (ii)  
483 the removal of components that are redundant or cause technical (downstream) difficulties or  
484 perturbation of cell behavior; and (iii) careful tuning of the concentration of medium  
485 compounds. The media consists of a phosphate buffer at pH 6.5, supplemented with all 20  
486 amino acids, the vitamins biotin, DL-6,8-thioctic acid, D-pantothenic acid, nicotinic acid,  
487 pyridoxal hydrochloride, pyridoxine hydrochloride and thiamine hydrochloride, and trace  
488 metals  $(\text{NH}_4)_6\text{Mo}_7\text{O}_{24}$ ,  $\text{CaCl}_2$ ,  $\text{CoSO}_4$ ,  $\text{CuSO}_4$ ,  $\text{FeCl}_2$ ,  $\text{MgCl}_2$ ,  $\text{MnCl}_2$  and  $\text{ZnSO}_4$ . Glucose was  
489 added to a final concentration of 25 mM and cultivation was performed under an anaerobic  
490 headspace. In order to study the effects of long term cultivation under constant conditions, *L.*  
491 *lactis* MG1363 was cultivated in 4 chemostats run in parallel at 30°C at the following dilution  
492 rates: 0.5 h<sup>-1</sup> for a total of 309 consecutive volume changes; 0.6 h<sup>-1</sup> for over 800 consecutive  
493 volume changes. A small sample was removed every 10-15 generations and stored at -80 °C  
494 in 20% (v/v) glycerol. In addition, the effluent was collected for optical density at 600 nm  
495 ( $\text{OD}_{600}$ ) measurements and HPLC analysis.

496 For subsequent studies, the glycerol stocks were used. 5 ml of fresh CDMPC was inoculated  
497 from the frozen glycerol stocks and grown for 16 h at 30°C. The overnight culture was  
498 subsequently diluted to a starting  $\text{OD}_{600}$  of 0.025-0.050 in either CDMPC or M17 medium  
499 (Oxoid, Basingstoke, United Kingdom) supplemented with 0.5% (w/v) glucose or other  
500 carbon sources as indicated.

501 ***Chemostat competition experiments between Genr0 and 309C1*** – The growth model  
502 parameterized using the data from the evolution experiments at a D of 0.5h<sup>-1</sup> was used to  
503 design the experiments, such that the initial fraction and sampling time-scheme would be  
504 adequate to capture the predicted wash-in kinetics of the evolved cells. Actual competition

505 experiments were preceded by running four-parallel chemostats for 10 volume changes as  
506 described above for  $D$ s of 0.2 and 0.3h<sup>-1</sup>. Of the four steady states independently established  
507 for each  $D$ , three included Genr0 and one 309C1. The competition stage was then initiated by  
508 transferring the 309C1 culture into the Genr0 steady states such that they made up ~10% of  
509 the population. After proper mixing a population sample is taken and considered to be  $t_0$ .  
510 Subsequently, and according to a predetermined sampling scheme, samples are removed from  
511 the chemostat effluent. The relative fractions of the population corresponding to Genr0 and  
512 309C1 were then determined in time resorting to pyrosequencing the *ccpA* locus (detailed in  
513 the supplementary material).

514 **Whole-genome sequencing and mutation detection** – DNA was extracted from the *L. lactis*  
515 single isolates using the GenElute™ Bacterial Genomic DNA kit (Sigma-Aldrich, St. Louis,  
516 MO, USA) according to the manufacturer's instructions except that the cells were first pre-  
517 treated with lysozyme at 10 mg/ml for 1 hour at 50°C. The isolates were sequenced with  
518 100bp single-end reads across one lane of an Illumina HiSEQ 2000 flow cell (Illumina). The  
519 resulting reads were deposited in the NCBI-SRA database (PRJNA185994). Reads were  
520 mapped to the reference genome of *L. lactis* ssp. *cremoris* MG1363 (GenBank accession  
521 number AM406671) and mutations detected using the CLC BIO Genomic Work Bench Suit  
522 4.5 (CLC BIO, Arhus, Denmark). The mutation lists were verified using PCR amplification  
523 and subsequent Sanger sequencing.

524 **Microarray analysis** – For RNA extraction, all strains were grown in CDMPC to the mid-  
525 exponential growth phase. Total RNA was isolated using the High Pure RNA isolation Kit  
526 (Roche Applied Science) and the quality was tested using an Agilent Bioanalyzer 2100  
527 (Agilent Technologies Netherlands BV). All procedure regarding microarrays were  
528 performed as described previously (van Hijum *et al.*, 2003, 2005). Data was processed and  
529 normalized using the Lowess method with Micro-Prep (van Hijum *et al.*, 2003) and lists of

530 significant gene expression changes were generated on the basis of a Bayes *p*-value and  
531 Benjamini Hochberg multiple testing corrections (Hochberg and Benjamini, 1990). The DNA  
532 microarray data have been submitted to GEO with accession number GSE67657.

533 The expression data was further analyzed by the Rank Product analysis (Breitling *et al.*,  
534 2004) using the software package R version 2.10.1. This generates a list of genes ranked  
535 according to ln ratio and calculates a conservative estimate of the percentage of false  
536 positives (pfp). Proteins with pfp values smaller than 0.05 (5%) were regarded as  
537 differentially expressed. The lists of significant gene expression levels were subjected to  
538 functional class analyses supported by the Genome2D webserver  
539 (<http://server.molgenrug.nl>). This results in a list of classes that are overrepresented in the  
540 dataset supplied on the basis of a hypergeometrical distribution test. The data for the  
541 functional classes was derived from the KEGG public data base  
542 (<http://www.genome.jp/kegg/ko.html>) and for regulons from PePPER (de Jong *et al.*, 2012).

543 **[<sup>14</sup>C]-glucose uptake** - Glucose uptake was monitored in whole cells using [<sup>14</sup>C]-labeled  
544 glucose essentially as previously described (Gouridis *et al.*, 2015). Briefly, all strains were  
545 grown in CDMPC and harvested at the mid-exponential growth phase, washed twice in ice-  
546 cold KPi buffer (50 mM, pH 6.5) and resuspended in KPi buffer to an OD<sub>600</sub> of 0.5. Uptake  
547 assays were performed at 30°C with stirring. [<sup>14</sup>C]-glucose was added to 100 µl cell  
548 suspension aliquots to a final concentration of 1.2-200 µM (0.005 µCi). The reactions were  
549 stopped by the addition of 2 ml of ice-cold 0.1 M LiCl and the samples were collected on  
550 0.45µm pore-size cellulose nitrate filters (Schleicher and Schuell GmbH, Dassel, Germany).  
551 The filters were again washed with 2 ml 0.1 M LiCl. The background was determined by  
552 adding the radiolabeled substrate to the cell suspension immediately after the addition of 2 ml  
553 of ice-cold LiCl, followed by filtering. The assays were performed in triplicate using cells  
554 from two independent cultures.

555 ***Electrophoretic mobility shift assays*** – To determine the *cre* site DNA binding affinity of  
556 CcpA, binding assays were performed with Cy3-labeled oligonucleotides. DNA  
557 oligonucleotides were from Biologio B.V. (Nijmegen, the Netherlands) with the (+) strand  
558 labelled at the 5' end with Cy3 and the (-) strand unlabeled. The oligonucleotides were mixed  
559 1:1, incubated at 98°C for 3 minutes and allowed to cool slowly to room temperature to  
560 facilitate annealing. The annealed DNA was used at 4 nM and added to binding buffer (20  
561 mM Tris-HCl pH8, 100 mM KCl, 10 mM MgCl<sub>2</sub>, 1 mM EDTA, 1 mM DTT, 5% glycerol)  
562 with additional BSA to 40 µg/ml. CcpA was added to concentrations between 100 nM and  
563 800 nM. The binding reaction was performed at 30 °C for 20 minutes after which the samples  
564 were mixed with 5 X gel loading buffer (0.25% bromophenol blue, 40% sucrose). The  
565 samples were analysed by electrophoresis on 7.5% native polyacrylamide gels using a TBE  
566 buffer (90 mM Tris, 90 mM Boric Acid, 2 mM EDTA pH8.0). The fluorescent-labelled  
567 oligonucleotides were visualised on a LAS-4000 imager (Fujifilm).

568 ***Molecular dynamics simulations*** - The simulated structures were based on the crystal  
569 structures of CcpA bound to different DNA sequences by Schumacher *et al.* (Schumacher *et*  
570 *al.*, 2011). Homology models of *L. lactis* proteins were created using the Swiss Model Server  
571 (Arnold *et al.*, 2006). The sequence identity of the DNA binding domain in proteins from *B.*  
572 *subtilis* and *L. lactis* is 77 % and only this region of the protein was used for the simulation.  
573 Structures with differing DNA sequences were produced by fitting the differing bases to a  
574 crystal structure before equilibrating the system. The protein domains after residue 64 were  
575 removed from the simulation system and a harmonic bond with a 1000 kJ/(mol nm<sup>2</sup>) force  
576 constant was set between the backbone atoms of the last residues to restrain the structure of  
577 the remaining domains. Each system was solvated in a dodecahedron box where each face of  
578 the box was at least 1 nm from the protein and the DNA. This amounted in average to about



579 14500 water molecules, 130 Na<sup>+</sup> ions and 110 Cl<sup>-</sup> ions, which corresponds to a 420 mM NaCl  
580 solution and counter-ions.

581 All simulations were run using the Gromacs 4.5.5 (Hess *et al.*, 2008) simulation package. The  
582 protein and DNA were modelled with CHARMM27 force field with CMAP corrections  
583 (Foloppe and MacKerell Jr., 2000; MacKerell, Feig and Brooks, 2004) together with the  
584 original TIP3P water model (Jorgensen *et al.*, 1983) as implemented in Gromacs 4.5.5.

585 Free energy changes were calculated from simulations using the Bennett acceptance ratio  
586 method (Bennett, 1976) with the g\_bar tool in Gromacs. Gromacs is a free software package  
587 available at <http://www.gromacs.org/>. Relative free energies of binding were calculated using  
588 a thermodynamic cycle described in Supplementary Figure 9.

589

## 590 **ACKNOWLEDGEMENTS**

591 This study was funded by the Kluyver Centre for Genomics of Industrial Fermentation and  
592 the Netherlands Consortium for Systems Biology (NCSB), within the framework of the  
593 Netherlands Genomics Initiative (NGI)/NWO. FBS, FJB and BT are supported by the  
594 Netherlands Organization for Scientific Research (NWO) through VENI grant 863.11.019,  
595 VIDI grant 864.11.011 and VICI grant 865.14.005 respectively.

596

## 597 **REFERENCES**

598 Arnold, K., Bordoli, L., Kopp, J. and Schwede, T. (2006) 'The SWISS-MODEL workspace:  
599 a web-based environment for protein structure homology modelling', *Bioinformatics*, 22(2),  
600 pp. 195–201. doi: 10.1093/bioinformatics/bti770.

601 Ashkenazy, H., Erez, E., Martz, E., Pupko, T. and Ben-Tal, N. (2010) 'ConSurf 2010:  
602 calculating evolutionary conservation in sequence and structure of proteins and nucleic  
603 acids', *Nucleic Acids Research*, 38(suppl 2), pp. W529–W533. doi: 10.1093/nar/gkq399.

604 Bachmann, H., Bruggeman, F. J., Molenaar, D., Branco dos Santos, F. and Teusink, B.

- 605 (2016) ‘Public goods and metabolic strategies’, *Current Opinion in Microbiology*, 31, pp.  
606 109–115. doi: 10.1016/j.mib.2016.03.007.
- 607 Bachmann, H., Fischlechner, M., Rabbers, I., Barfa, N., Branco dos Santos, F., Molenaar, D.  
608 and Teusink, B. (2013) ‘Availability of public goods shapes the evolution of competing  
609 metabolic strategies’, *Proceedings of the National Academy of Sciences*, 110(35), pp. 14302–  
610 7. doi: 10.1073/pnas.1308523110.
- 611 Bachmann, H., Starrenburg, M. J. C., Molenaar, D., Kleerebezem, M. and van Hylckama  
612 Vlieg, J. E. T. (2012) ‘Microbial domestication signatures of *Lactococcus lactis* can be  
613 reproduced by experimental evolution’, *Genome research*, 22, pp. 115–124. doi:  
614 10.1101/gr.121285.111.
- 615 Barrick, J. E., Yu, D. S., Yoon, S. H., Jeong, H., Oh, T. K., Schneider, D., Lenski, R. E. and  
616 Kim, J. F. (2009) ‘Genome evolution and adaptation in a long-term experiment with  
617 *Escherichia coli*.’, *Nature*, 461(7268), pp. 1243–7. doi: 10.1038/nature08480.
- 618 Basan, M., Hui, S., Okano, H., Zhang, Z., Shen, Y., Williamson, J. R. and Hwa, T. (2015)  
619 ‘Overflow metabolism in *Escherichia coli* results from efficient proteome allocation’, *Nature*.  
620 Nature Publishing Group, 528(7580), pp. 99–104. doi: 10.1038/nature15765.
- 621 Bennett, C. H. (1976) ‘Efficient estimation of free energy differences from Monte Carlo  
622 data’, *Journal of Computational Physics*, 22(2), pp. 245–268. doi:  
623 [http://dx.doi.org/10.1016/0021-9991\(76\)90078-4](http://dx.doi.org/10.1016/0021-9991(76)90078-4).
- 624 Breitling, R., Armengaud, P., Amtmann, A. and Herzyk, P. (2004) ‘Rank products: a simple,  
625 yet powerful, new method to detect differentially regulated genes in replicated microarray  
626 experiments’, *FEBS Letters*, 573(1–3), pp. 83–92.
- 627 Buist, G., Kok, J., Leenhouts, K. J., Dabrowska, M., Venema, G. and Haandrikman, A. J.  
628 (1995) ‘Molecular cloning and nucleotide sequence of the gene encoding the major  
629 peptidoglycan hydrolase of *Lactococcus lactis*, a muramidase needed for cell separation.’,  
630 *Journal of bacteriology*, 177(6), pp. 1554–63.
- 631 Castro, R., Neves, A. R., Fonseca, L. L., Pool, W. A., Kok, J., Kuipers, O. P. and Santos, H.  
632 (2009) ‘Characterization of the individual glucose uptake systems of *Lactococcus lactis*:  
633 mannose-PTS, cellobiose-PTS and the novel GlcU permease’, *Molecular Microbiology*.  
634 Blackwell Publishing Ltd, 71(3), pp. 795–806. doi: 10.1111/j.1365-2958.2008.06564.x.
- 635 Colegrave, N. and Collins, S. (2008) ‘Experimental evolution: experimental evolution and

- 636 evolvability.’, *Heredity*. Nature Publishing Group, 100(5), pp. 464–470. doi:  
637 10.1038/sj.hdy.6801095.
- 638 Dekel, E. and Alon, U. (2005) ‘Optimality and evolutionary tuning of the expression level of  
639 a protein’, *Nature*, 436(7050), pp. 588–592.
- 640 Deutscher, J., Francke, C. and Postma, P. W. (2006) ‘How phosphotransferase system-related  
641 protein phosphorylation regulates carbohydrate metabolism in bacteria.’, *Microbiology and  
642 molecular biology reviews : MMBR*, 70(4), pp. 939–1031. doi: 10.1128/MMBR.00024-06.
- 643 Foloppe, N. and MacKerell Jr., A. D. (2000) ‘All-atom empirical force field for nucleic acids:  
644 I. Parameter optimization based on small molecule and condensed phase macromolecular  
645 target data’, *Journal of Computational Chemistry*. John Wiley & Sons, Inc., 21(2), pp. 86–  
646 104. doi: 10.1002/(SICI)1096-987X(20000130)21:2<86::AID-JCC2>3.0.CO;2-G.
- 647 Forsman, A. (2014) ‘Rethinking phenotypic plasticity and its consequences for individuals,  
648 populations and species.’, *Heredity*. Nature Publishing Group, 115(August), pp. 1–9. doi:  
649 10.1038/hdy.2014.92.
- 650 Goel, A., Eckhardt, T. H., Puri, P., Jong, A., Branco dos Santos, F., Giera, M., Fusetti, F.,  
651 Vos, W. M., Kok, J., Poolman, B., Molenaar, D., Kuipers, O. P. and Teusink, B. (2015)  
652 ‘Protein costs do not explain evolution of metabolic strategies and regulation of ribosomal  
653 content’, *Molecular Microbiology*. doi: 10.1111/mmi.13012.
- 654 Goel, A., Eckhardt, T. H., Puri, P., Jong, A., Branco dos Santos, F., Giera, M., Fusetti, F.,  
655 Vos, W. M., Kok, J., Poolman, B., Molenaar, D., Kuipers, O. P., Teusink, B., de Jong, A.,  
656 Branco dos Santos, F., Giera, M., Fusetti, F., de Vos, W. M., Kok, J., Poolman, B., Molenaar,  
657 D., Kuipers, O. P. and Teusink, B. (2015) ‘Protein costs do not explain evolution of  
658 metabolic strategies and regulation of ribosomal content’, *Molecular Microbiology*, 97(1), pp.  
659 77–92. doi: 10.1111/mmi.13012.
- 660 Görke, B. and Stülke, J. (2008) ‘Carbon catabolite repression in bacteria: many ways to make  
661 the most out of nutrients.’, *Nature reviews. Microbiology*. Nature Publishing Group, 6(8), pp.  
662 613–24. doi: 10.1038/nrmicro1932.
- 663 Gouridis, G., Schuurman-Wolters, G. K., Ploetz, E., Husada, F., Vietrov, R., de Boer, M.,  
664 Cordes, T. and Poolman, B. (2015) ‘Conformational dynamics in substrate-binding domains  
665 influences transport in the ABC importer GlnPQ.’, *Nature structural & molecular biology*.  
666 Nature Publishing Group, a division of Macmillan Publishers Limited. All Rights Reserved.,  
667 22(1), pp. 57–64. doi: 10.1038/nsmb.2929.

- 668 Gresham, D. and Hong, J. (2014) ‘The functional basis of adaptive evolution in chemostats.’,  
669 *FEMS microbiology reviews*. The Oxford University Press, 39(1), pp. 2–16. doi:  
670 10.1111/1574-6976.12082.
- 671 Hess, B., Kutzner, C., van der Spoel, D. and Lindahl, E. (2008) ‘GROMACS 4: Algorithms  
672 for Highly Efficient, Load-Balanced, and Scalable Molecular Simulation’, *Journal of*  
673 *Chemical Theory and Computation*, 4(3), pp. 435–447. doi: 10.1021/ct700301q.
- 674 van Hijum, S. A. F. T., de Jong, A., Buist, G., Kok, J. and Kuipers, O. P. (2003) ‘UniFrag  
675 and GenomePrimer: selection of primers for genome-wide production of unique amplicons ’,  
676 *Bioinformatics* , 19(12), pp. 1580–1582. doi: 10.1093/bioinformatics/btg203.
- 677 van Hijum, S., de Jong, A., Baerends, R., Karsens, H., Kramer, N., Larsen, R., den Hengst,  
678 C., Albers, C., Kok, J. and Kuipers, O. (2005) ‘A generally applicable validation scheme for  
679 the assessment of factors involved in reproducibility and quality of DNA-microarray data’,  
680 *BMC Genomics*, 6(1), p. 77. doi: 10.1186/1471-2164-6-77.
- 681 Hochberg, Y. and Benjamini, Y. (1990) ‘More powerful procedures for multiple significance  
682 testing’, *Statistics in Medicine*. Wiley Subscription Services, Inc., A Wiley Company, 9(7),  
683 pp. 811–818. doi: 10.1002/sim.4780090710.
- 684 Hui, S., Silverman, J. M., Chen, S. S., Erickson, D. W., Basan, M., Wang, J., Hwa, T. and  
685 Williamson, J. R. (2015) ‘Quantitative proteomic analysis reveals a simple strategy of global  
686 resource allocation in bacteria.’, *Molecular systems biology*. EMBO Press, 11(1), p. 784. doi:  
687 10.15252/msb.20145697.
- 688 Jensen, P. R. and Hammer, K. (1993) ‘Minimal Requirements for Exponential Growth of  
689 *Lactococcus lactis*.’, *Applied and environmental microbiology*, 59(12), pp. 4363–6.
- 690 de Jong, A., Pietersma, H., Cordes, M., Kuipers, O. and Kok, J. (2012) ‘PePPER: a webserver  
691 for prediction of prokaryote promoter elements and regulons’, *BMC Genomics*, 13(1), p. 299.  
692 doi: 10.1186/1471-2164-13-299.
- 693 Jorgensen, W. L., Chandrasekhar, J., Madura, J. D., Impey, R. W. and Klein, M. L. (1983)  
694 ‘Comparison of simple potential functions for simulating liquid water’, *The Journal of*  
695 *Chemical Physics*. AIP, 79(2), pp. 926–935. doi: 10.1063/1.445869.
- 696 Kotte, O., Zaugg, J. B. and Heinemann, M. (2010) ‘Bacterial adaptation through distributed  
697 sensing of metabolic fluxes.’, *Molecular systems biology*. Nature Publishing Group, 6(355),  
698 p. 355. doi: 10.1038/msb.2010.10.

- 699 Kuipers, O. P., de Jong, A., Baerends, R. J. S., van Hijum, S. A. F. T., Zomer, A. L., Karsens,  
700 H. A., den Hengst, C. D., Kramer, N. E., Buist, G. and Kok, J. (2002) ‘Transcriptome  
701 analysis and related databases of *Lactococcus lactis*.’, *Antonie van Leeuwenhoek*, 82(1–4),  
702 pp. 113–22.
- 703 Lázár, V., Pal Singh, G., Spohn, R., Nagy, I., Horváth, B., Hrtyan, M., Busa-Fekete, R.,  
704 Bogos, B., Méhi, O., Csörgő, B., Pósfai, G., Fekete, G., Szappanos, B., Kégl, B., Papp, B.  
705 and Pál, C. (2013) ‘Bacterial evolution of antibiotic hypersensitivity.’, *Molecular systems*  
706 *biology*. EMBO Press, 9(1), p. 700. doi: 10.1038/msb.2013.57.
- 707 Linares, D. M., Kok, J. and Poolman, B. (2010) ‘Genome sequences of *Lactococcus lactis*  
708 MG1363 (revised) and NZ9000 and comparative physiological studies.’, *Journal of*  
709 *bacteriology*, 192(21), pp. 5806–12. doi: 10.1128/JB.00533-10.
- 710 MacKerell, A. D., Feig, M. and Brooks, C. L. (2004) ‘Improved Treatment of the Protein  
711 Backbone in Empirical Force Fields’, *Journal of the American Chemical Society*, 126(3), pp.  
712 698–699. doi: 10.1021/ja036959e.
- 713 Marciniak, B. C., Pabijaniak, M., de Jong, A., Dühring, R., Seidel, G., Hillen, W. and  
714 Kuipers, O. P. (2012) ‘High- and low-affinity cre boxes for CcpA binding in *Bacillus subtilis*  
715 revealed by genome-wide analysis.’, *BMC genomics*. BioMed Central, 13(1), p. 401. doi:  
716 10.1186/1471-2164-13-401.
- 717 Meadows, A. L., Karnik, R., Lam, H., Forestell, S. and Snedecor, B. (2010) ‘Application of  
718 dynamic flux balance analysis to an industrial *Escherichia coli* fermentation.’, *Metabolic*  
719 *engineering*, 12(2), pp. 150–60. doi: 10.1016/j.ymben.2009.07.006.
- 720 Molenaar, D., van Berlo, R., de Ridder, D. and Teusink, B. (2009) ‘Shifts in growth strategies  
721 reflect tradeoffs in cellular economics.’, *Molecular systems biology*. Nature Publishing  
722 Group, 5(323), p. 323. doi: 10.1038/msb.2009.82.
- 723 Moxley, J. F., Jewett, M. C., Antoniewicz, M. R., Villas-Boas, S. G., Alper, H., Wheeler, R.  
724 T., Tong, L., Hinnebusch, A. G., Ideker, T., Nielsen, J. and Stephanopoulos, G. (2009)  
725 ‘Linking high-resolution metabolic flux phenotypes and transcriptional regulation in yeast  
726 modulated by the global regulator Gcn4p’, *Proceedings of the National Academy of Sciences*  
727 , 106(16), pp. 6477–6482. doi: 10.1073/pnas.0811091106.
- 728 Novick, A. and Szilard, L. (1950) ‘Description of the Chemostat’, *Science*, 112(2920).
- 729 O’Brien, E. J., Lerman, J. A., Chang, R. L., Hyduke, D. R. and Palsson, B. Ø. (2013)

- 730 ‘Genome-scale models of metabolism and gene expression extend and refine growth  
731 phenotype prediction.’, *Molecular systems biology*. European Molecular Biology  
732 Organization, 9(693), p. 693. doi: 10.1038/msb.2013.52.
- 733 O’Brien, E. J., Utrilla, J. and Palsson, B. O. (2016) ‘Quantification and Classification of E.  
734 coli Proteome Utilization and Unused Protein Costs across Environments’, *PLOS*  
735 *Computational Biology*. Edited by C. D. Maranas. Public Library of Science, 12(6), p.  
736 e1004998. doi: 10.1371/journal.pcbi.1004998.
- 737 Oliveira, A., Nielsen, J. and Förster, J. (2005) ‘Modeling *Lactococcus lactis* using a genome-  
738 scale flux model’, *BMC microbiology*, 15, pp. 1–15. doi: 10.1186/1471-2180-5-39.
- 739 Pigliucci, M. (2008) ‘Is evolvability evolvable?’, *Nature reviews Genetics*. Nature Publishing  
740 Group, 9(1), pp. 75–82. doi: 10.1038/nrg2278.
- 741 Poolman, B. and Konings, W. N. (1988) ‘Relation of growth of *Streptococcus lactis* and  
742 *Streptococcus cremoris* to amino acid transport’, *J Bacteriol.* 1988/02/01, 170(2), pp. 700–  
743 707.
- 744 Schumacher, M. A., Sprehe, M., Bartholomae, M., Hillen, W. and Brennan, R. G. (2011)  
745 ‘Structures of carbon catabolite protein A-(HPr-Ser46-P) bound to diverse catabolite response  
746 element sites reveal the basis for high-affinity binding to degenerate DNA operators.’,  
747 *Nucleic acids research*, 39(7), pp. 2931–42. doi: 10.1093/nar/gkq1177.
- 748 Scott, M., Klumpp, S., Mateescu, E. M. and Hwa, T. (2014) ‘Emergence of robust growth  
749 laws from optimal regulation of ribosome synthesis.’, *Molecular systems biology*, 10, p. 747.
- 750 Scott, M., Mateescu, E. M., Zhang, Z. and Hwa, T. (2010) ‘Interdependence of Cell Growth  
751 Origins and Consequences’, *Science*. American Association for the Advancement of Science,  
752 330(November), pp. 1099–1102. doi: 10.1126/science.1192588.
- 753 Snell-Rood, E. C., Van Dyken, J. D., Cruickshank, T., Wade, M. J. and Moczek, A. P. (2010)  
754 ‘Toward a population genetic framework of developmental evolution: The costs, limits, and  
755 consequences of phenotypic plasticity’, *BioEssays*. NIH Public Access, pp. 71–81. doi:  
756 10.1002/bies.200900132.
- 757 Solopova, A., Bachmann, H., Teusink, B., Kok, J., Neves, A. R. and Kuipers, O. P. (2012) ‘A  
758 specific mutation in the promoter region of the silent *cel* cluster accounts for the appearance  
759 of lactose-utilizing *Lactococcus lactis* MG1363.’, *Applied and environmental microbiology*,  
760 78(16), pp. 5612–21. doi: 10.1128/AEM.00455-12.

761 Thomas, T. D., Ellwood, D. C. and Longyear, V. M. (1979) ‘Change from homo- to  
762 heterolactic fermentation by *Streptococcus lactis* resulting from glucose limitation in  
763 anaerobic chemostat cultures.’, *Journal of bacteriology*, 138(1), pp. 109–17.

764 Wisner, M. J., Ribeck, N. and Lenski, R. E. (2013) ‘Long-term dynamics of adaptation in  
765 asexual populations.’, *Science (New York, N.Y.)*, 342(6164), pp. 1364–7. doi:  
766 10.1126/science.1243357.

767 Wortel, M. T., Bosdriesz, E., Teusink, B. and Bruggeman, F. J. (2016) ‘Evolutionary  
768 pressures on microbial metabolic strategies in the chemostat’, *Scientific Reports*. Nature  
769 Publishing Group, 6, p. 29503. doi: 10.1038/SREP29503.

770

771

**a**

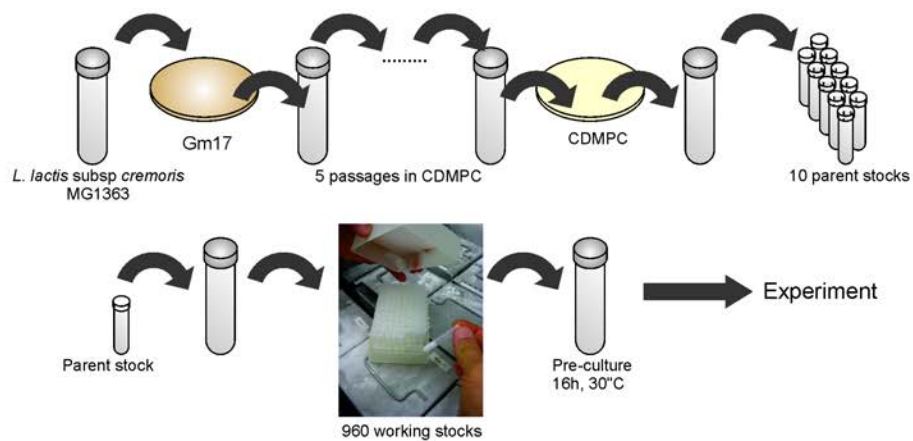

**b**

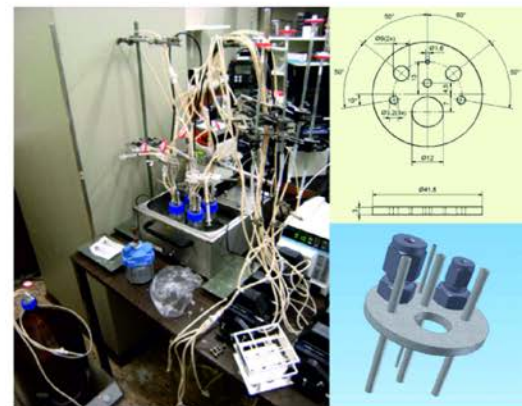

**c**

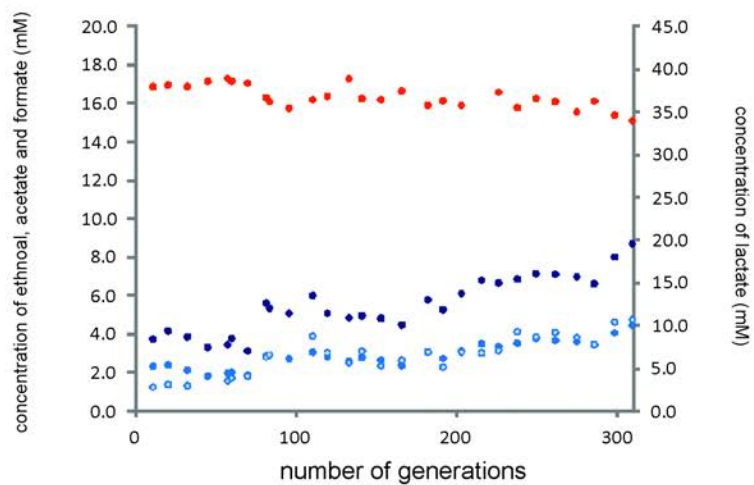



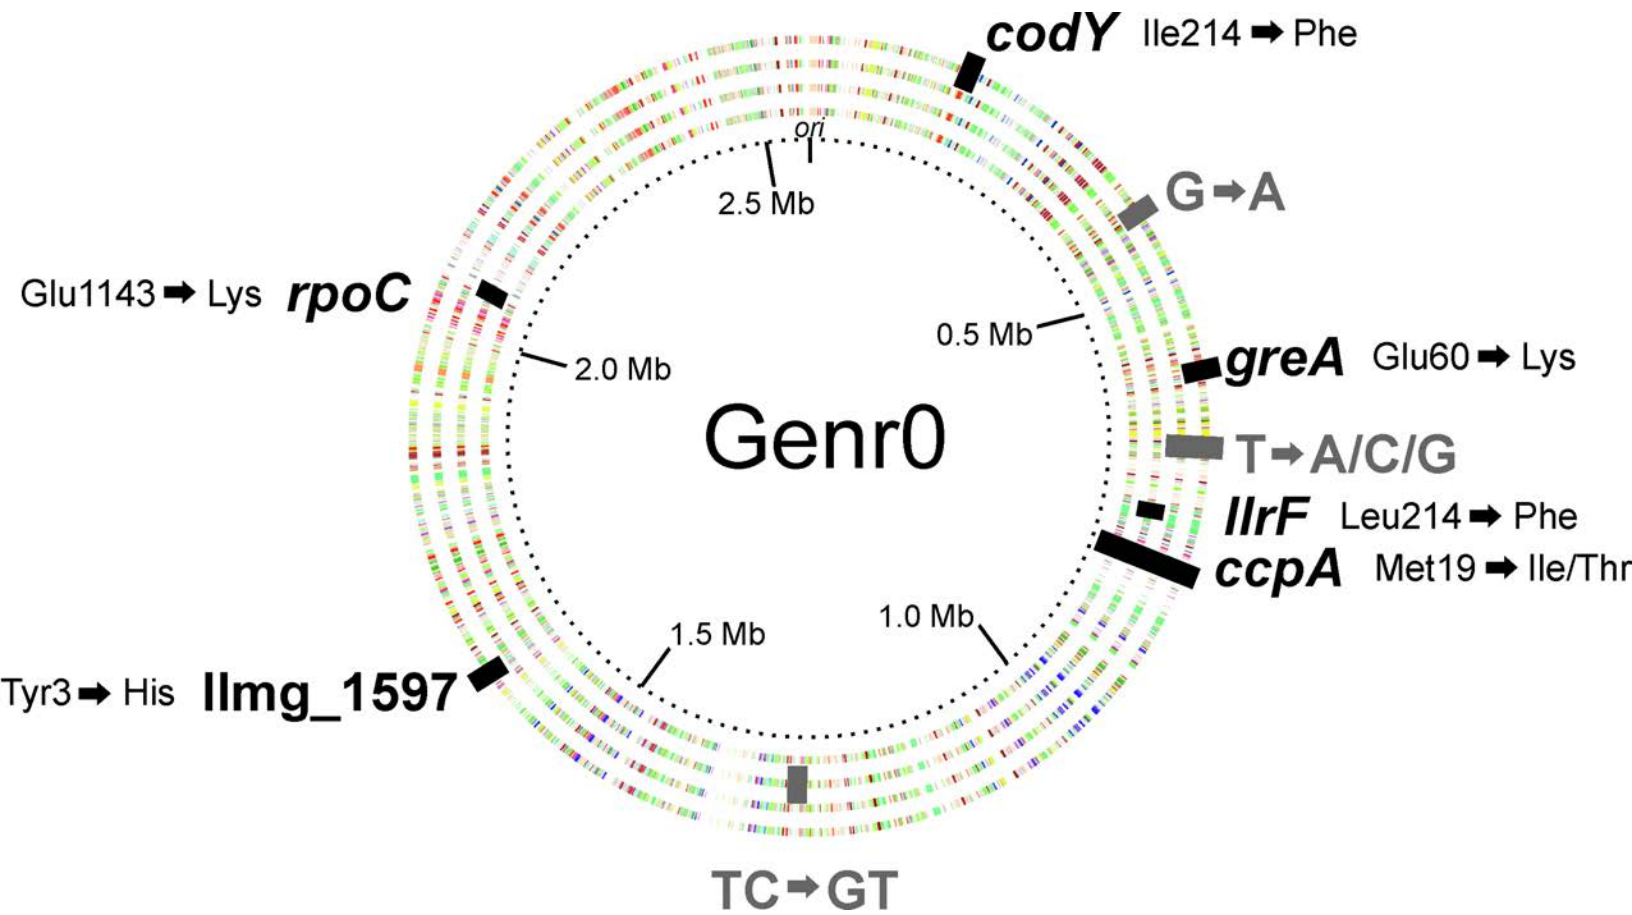

**a**

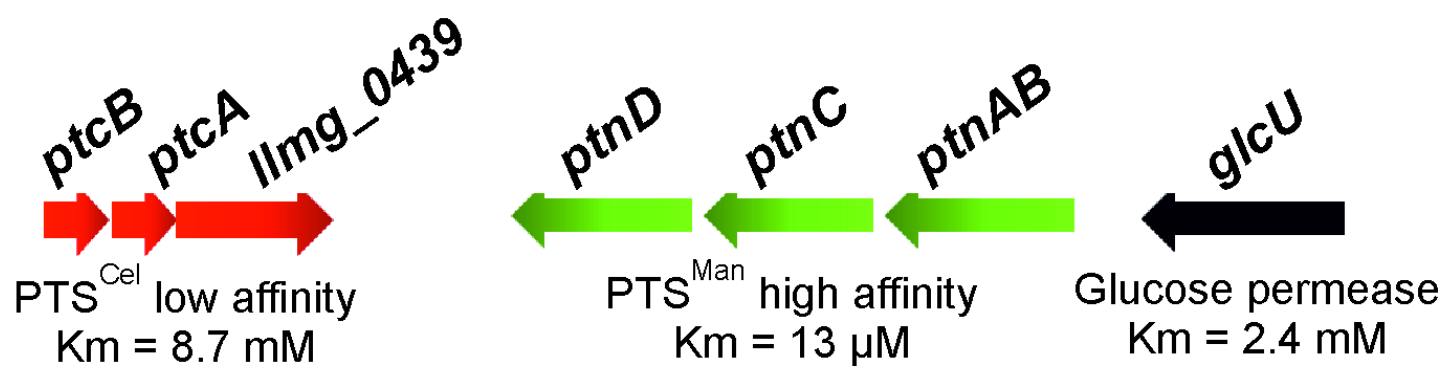

**b**

| Strain | Glucose uptake and metabolism   |                         |
|--------|---------------------------------|-------------------------|
|        | Vmax<br>(nmol/min x mg protein) | Km<br>( $\mu\text{M}$ ) |
| Genr0  | 176.0 $\pm$ 13.1                | 21.0 $\pm$ 0.8          |
| 309C1  | 484.7 $\pm$ 37.2                | 22.2 $\pm$ 0.7          |

a

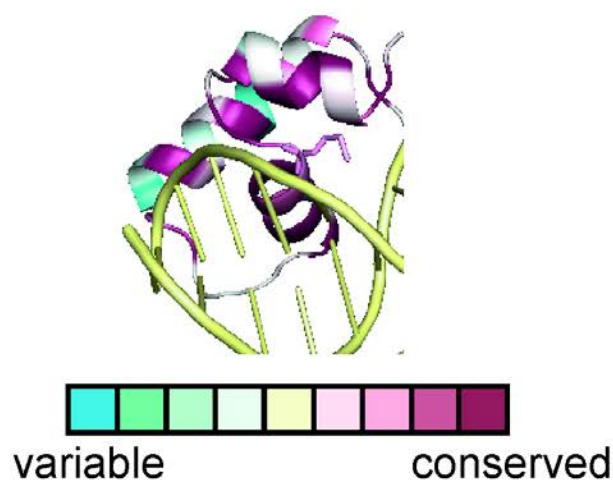

b

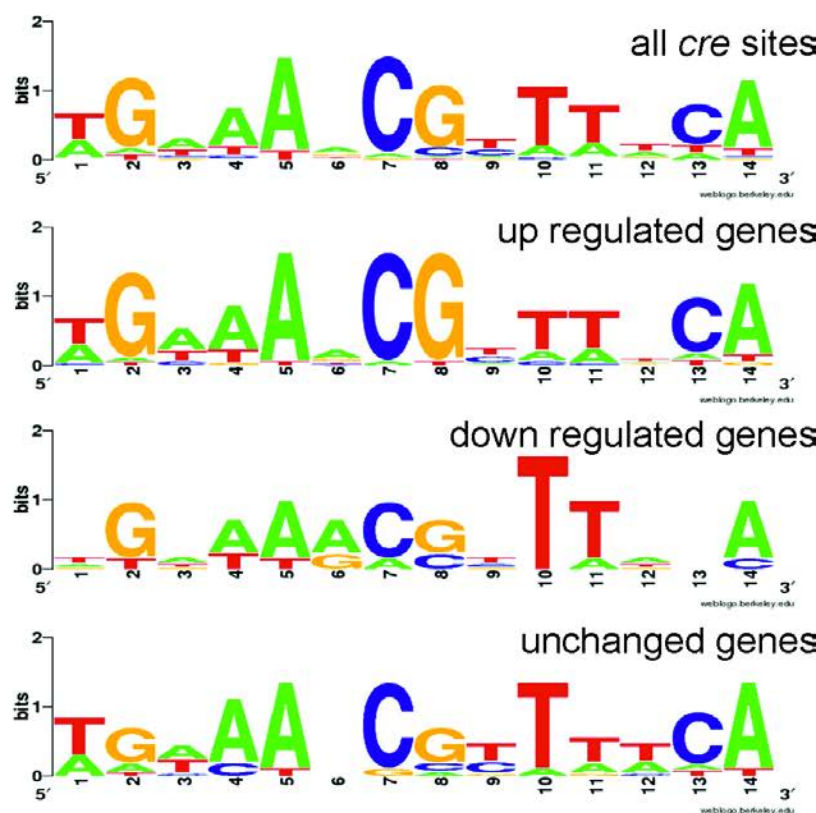

c

| cre site                     | Starting structure | DNA sequence     | Relative free energy (kJ/mol) | $K_D$ (GenR0)/ $K_D$ (variant) |
|------------------------------|--------------------|------------------|-------------------------------|--------------------------------|
| <b>CcpA-Ile<sup>19</sup></b> |                    |                  |                               |                                |
| perfect                      | 3OQO               | CTGTTAGCGCTTTCAG | $-14.5 \pm 2$                 | 350                            |
| deviant                      | 3OQO               | CTGTTAGCGCTTTAAG | $-14.5 \pm 2$                 | 350                            |
|                              | 3OQM               |                  | $-9.3 \pm 3$                  | 43                             |
| <i>ptcB</i>                  | 3OQO               | TAGATAACGCTTACAT | $-8.6 \pm 3$                  | 32                             |
|                              | 3OQM               |                  | $-6.2 \pm 3$                  | 12                             |
| <i>mtlD</i>                  | 3OQO               | ATGTAAAAGCTTACAA | $-9.2 \pm 2$                  | 41                             |
|                              | 3OQM               |                  | $-16.7 \pm 2$                 | 810                            |
| <b>CcpA-Thr<sup>19</sup></b> |                    |                  |                               |                                |
| perfect                      | 3OQO               | CTGTTAGCGCTTTCAG | $2.7 \pm 2$                   | 0.3                            |

d

| CcpA variant           | CcpA concentration at which binding is observed ( $\mu\text{M}$ ) |                                |             |
|------------------------|-------------------------------------------------------------------|--------------------------------|-------------|
|                        | perfect                                                           | <i>cre</i> site<br><i>ptcB</i> | <i>mtlD</i> |
| CcpA-Met <sup>19</sup> | 0.4                                                               | >1.6                           | 0.4         |
| CcpA-Ile <sup>19</sup> | 0.1                                                               | 0.4                            | 0.2         |

**a** Competition experiment  
 $D = 0.2$  1/h

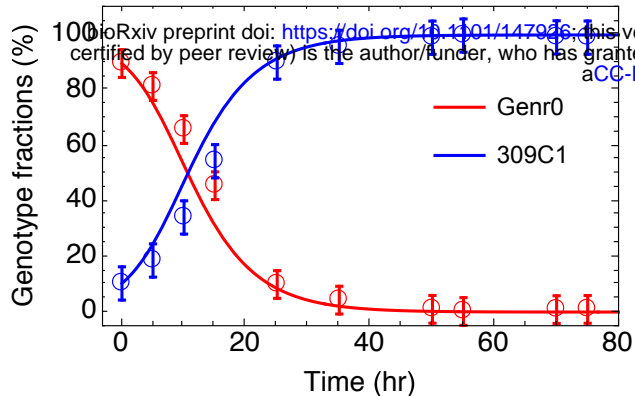

**b** Competition experiment  
 $D = 0.3$  1/h

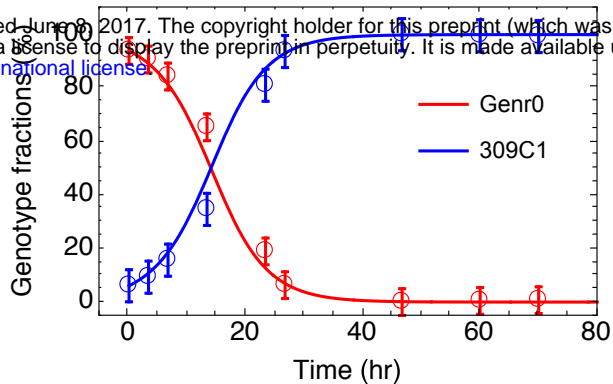

1 **Supplementary Information to:**

2 **Title:** Glucose-limitation in *Lactococcus lactis* shapes a single-peaked fitness landscape that  
3 exposes membrane occupancy as a dominant constraint

4

5

6 **Authors:**

7 Claire E. Price<sup>a,b,c,1,2</sup>, Filipe Branco dos Santos<sup>c,d,e,2</sup>, Anne Hesselting<sup>a</sup>, Jaakko J. Uusitalo<sup>f</sup>,  
8 Herwig Bachmann<sup>c,d</sup>, Vera Benavente<sup>d</sup>, Anisha Goel<sup>c,d,3</sup>, Jan Berkhout<sup>d</sup>, Frank J.  
9 Bruggeman<sup>d</sup>, Siewert-Jan Marrink<sup>f</sup>, Manolo Montalban-Lopez<sup>a</sup>, Anne de Jong<sup>a</sup>, Jan Kok<sup>a</sup>,  
10 Douwe Molenaar<sup>c,d</sup>, Bert Poolman<sup>b</sup>, Bas Teusink<sup>c,d</sup>, Oscar P. Kuipers<sup>a,c</sup>

11

12 **Author affiliations:**

13 <sup>a</sup> Molecular Genetics group, University of Groningen, Nijenborgh 7, 9747 AG Groningen, the  
14 Netherlands

15 <sup>b</sup> Department of Biochemistry, University of Groningen, Nijenborgh 4, 9747 AG Groningen,  
16 the Netherlands

17 <sup>c</sup> Kluwyer Center for Genomics of Industrial Fermentations/NCSB, Julianalaan 67, 2628 BC  
18 Delft, The Netherlands

19 <sup>d</sup> Systems Bioinformatics, Faculty of Earth and Life Sciences, VU University Amsterdam, De  
20 Boelelaan 1085, 1081 HV Amsterdam, The Netherlands

21 <sup>e</sup> Molecular Microbial Physiology Group, Faculty of Life Sciences, Swammerdam Institute of  
22 Life Sciences, University of Amsterdam, Science Park 904, Amsterdam 1098 XH,  
23 Netherlands

24 <sup>f</sup> Molecular Dynamics group, University of Groningen, Nijenborgh 7, 9747 AG Groningen,  
25 the Netherlands

26

27 **Author footnotes:**

28 <sup>1</sup> Current address: DSM Biotechnology Centre, Alexander Fleminglaan 1, 2613 AX, Delft,  
29 The Netherlands

30 <sup>2</sup> Both authors contributed equally

31 <sup>3</sup> Current address: Chr. Hansen, Boege Allé 10-12, 2970 Hoersholm, Denmark

32

33 **Corresponding authors:** [b.teusink@vu.nl](mailto:b.teusink@vu.nl) and [o.p.kuipers@rug.nl](mailto:o.p.kuipers@rug.nl)

34

## 35 **Supplementary Results**

### 36 ***Mutations in all sequenced strains compared to published sequences***

37 The sequences of Genr0 and the evolved strains were compared to those published for *L.*  
38 *lactis* MG1363. All strains contained a mutation in *malR* which would result in a frameshift  
39 in the maltose operon transcriptional repressor MalR. This could be due to sequencing errors  
40 from adjacent C nucleotides or a truncated MalR protein. The truncation would result in a  
41 HTH DNA binding domain without a ligand-binding domain.

42

### 43 ***Mutations unique to strains 309C2, 309C3 and 309C4***

44 The effect of the mutations identified in *rpoC* in 309C2 and *greA* in 309C4 on transcriptional  
45 fidelity were investigated using *lacZ* constructs with a premature stop codon at position Glu<sup>13</sup>  
46 (P. Gamba and J.W. Veening, unpublished data). However,  $\beta$ -galactosidase activity was  
47 similar in the evolved strains and the original strains Genr0 and *L. lactis* MG1363  
48 (Supplementary Figure 2), indicating that in the evolved strains, RNA polymerase and  
49 elongation factor function as they do in wild type strains.

50 Since proteins encoded by *llmg\_1597*, a hypothetical protein possibly with RNA-binding  
51 function, and *llrF*, a two-component system regulator, are not well-characterized, no  
52 prediction as to change or function could be made for the mutations identified. In contrast,  
53 CodY is a well-studied transcriptional regulator of nitrogen metabolism and based on  
54 structural studies it can be predicted that the SNP identified results in a Phe substitution for  
55 Ile<sup>214</sup> in the DNA binding domain (Levdikov, Blagova, Joseph, Sonenshein, & Wilkinson,  
56 2006). The absence of a high-resolution structure of CodY bound to a DNA operator makes  
57 any further prediction of the effect on DNA binding difficult.

58 A number of SNPs were predicted to lie in non-coding regions at positions that lie in or near  
59 putative promoter sequences, thus making predictions as to the effect of such mutations  
60 difficult. The SNP at position 490263 resulted in an altered ribosomal binding site  
61 (GGAGGA to GGAGAA) upstream of the gene for a Hu-like DNA binding protein, *hllA*.  
62 This could suggest that a modest reduction of the translation of this mRNA, encoding a  
63 putative DNA-binding protein, could take place.

64

### 65 ***Global gene expression patterns of evolved strains***

66 The evolved strains were revived in CDMPC and grown until mid-exponential phase at  
67 which microarray analysis using in-house *L. lactis* MG1363 slides (Kuipers et al. 2002) was

68 performed. Gene expression in the evolved strains was compared to that of Gen0. A total  
69 number of 377 genes exhibited changed expression in the evolved strains (Supplementary  
70 Table 4). Approximately a third of the changes were in at least 3 of the 4 strains. Altered gene  
71 expression was dominantly in genes involved in membrane transport, especially carbohydrate  
72 import (Supplementary Figure 3A, Supplementary Table 3, Supplementary Table 4).  
73 Regulon analysis of the differentially expressed genes revealed that CcpA-regulated genes  
74 were over-represented in the data set. For strain 309C4, those regulated by CodY were  
75 prevalent as well (Supplementary Figure 3B, Supplementary Table 3).

76 CcpA controls the preferential use of glucose over other sugars (Deutscher et al. 2006),  
77 including expression of sugar uptake systems such as those for glucose. Transcriptome  
78 analysis of all the evolve strains revealed similar patterns of expression and increased glucose  
79 uptake (Supplementary Figure 3C and D).

80 The ability to utilize other carbon sources was diminished for the evolved strains  
81 (Supplementary Figure 4A) in accordance with the down regulation of, amongst others, genes  
82 encoding for maltose transporters, ABC sugar import systems and sugar utilization enzymes  
83 in the microarray data (Supplementary Table 3). Many of these genes are CcpA-regulated.

84

### 85 ***Phenotypic characterization of evolved strains to identify effects of transcriptional*** 86 ***regulation.***

87 The strains were not only adapted to the constant culture conditions through expression  
88 changes in carbohydrate uptake and utilization systems, but also through changes in the  
89 expression levels of genes involved in amino acid uptake and metabolism. Ordinarily, *L.*  
90 *lactis* MG1363 grows faster when amino acids are taken up as oligopeptides than when only  
91 free amino acids are available (Supplementary Figure 5B). This is due to the efficient import  
92 of oligopeptides by the major oligopeptide transporter Opp (Detmers et al., 2000).  
93 Cultivation in free amino acids led to the down regulation of the entire *opp* operon  
94 (Supplementary Figure 5A) and the cells were as a result impaired in growth on oligopeptide  
95 containing medium (Supplementary Figure 5B and C). The difference in growth in  
96 oligopeptide-containing medium between the evolved strains and Genr0 is well correlated  
97 with the expression levels of the *opp* operon except in the case of 309C4. In this strain the  
98 down regulation of the *opp* operon appears to be partially compensated for by the  
99 concomitant up regulation of the analogous *opp2* operon. This operon was previously

100 thought to be cryptic in *L. lactis* MG1363 (Sanz et al. 2004), but in our evolved strain is  
101 expressed and OppA2 was detected using mass spectrometry (data not shown).

102 Prolonged cultivation under an anaerobic atmosphere had a dramatic effect on the ability of  
103 the evolved strains to utilize the electron transport chain present in *L. lactis*. *L. lactis* is  
104 unable to synthesize heme *de novo*, but if heme is added to the growth medium, the bacterium  
105 can synthesize the cytochromes needed for the generation of a proton motive force (PMF)  
106 and subsequent ATP synthesis at the membrane-embedded ATP synthase (Brooijmans et al.  
107 2007). This results in an increase in biomass (Cesselin et al. 2001) as observed for Genr0  
108 (Supplementary Figure 6). The evolved strains did not show any increase in biomass upon  
109 addition of heme to the medium and expression data showed the down regulation of a number  
110 of NADH oxidases/dehydrogenases (Supplementary Table 3) which are likely to be  
111 responsible for the inability of these strains to respire.

112 In addition the evolved strains displayed a well-characterized long-chain phenotype  
113 associated with a deficiency in the major autolysin AcmA (Supplementary Figure 7) (Buist et  
114 al. 1995). The expression of the *acmA* gene was down regulated in all the evolved strains  
115 (Supplementary Table 3) and in agreement with the down regulation of the *acmA* gene, the  
116 evolved cells were less prone to lysis in the stationary growth phase (Supplementary Figure  
117 7).

118

### 119 ***Effect of M19I mutation on the binding affinity of CcpA***

120 The effects of the *ccpA* mutations were investigated using homology modeling, molecular  
121 dynamic simulations and *in vitro* binding assays using purified CcpA from the mutated  
122 strains. The high-resolution structure of *B. subtilis* CcpA was used to model *L. lactis* CcpA  
123 (Figure 4A and Supplementary Figure 8) (Schumacher et al. 2011) since the one published  
124 for *L. lactis* CcpA lacks the N-terminal DNA-binding domain (Loll et al. 2007). The structure  
125 from *B. subtilis* includes CcpA bound to the DNA catabolic response element (*cre* site) as  
126 well as the activating phosphoprotein HPr. Met19 is located in the second helix contained in  
127 the DNA binding domain. The methionine at this position is highly conserved across all  
128 Gram-positive CcpA proteins sequenced to date and in 4 natural isolates of *L. lactis* for which  
129 the *ccpA* locus was resequenced (Supplementary Table 6).

130 The binding of CcpA from Genr0 and 309F1 to 4 DNA operators was examined: synthetic  
131 *cre* sites, *cre* site upstream of *ptcB*, *cre* site upstream of *mtlD* and, as a negative control, the  
132 CodY binding sequence upstream of *oppD* (Figure 4D and Supplementary 10), representing



133 genes that are down regulated as well as up regulated in the evolved strains. For all the cre  
134 sites tested, the CcpA-Ile19 variant showed an increase in binding affinity for the DNA  
135 operators tested. This was most pronounced for the sequence upstream of *ptcB* and least  
136 pronounced for *mtlD*.

137

### 138 ***Evolution of CcpA-Thr<sup>19</sup> variant***

139 The appearance of and subsequent dominance of the *ccpA* mutations was tracked in time  
140 during the evolution experiment through PCR amplification of the *ccpA* locus from the frozen  
141 stocks. The PCR products were resequenced using traditional Sanger sequencing, with  
142 manual chromatogram inspection, as well as pyrosequencing, which allows for the  
143 quantitation of SNPs in a population. In addition, frozen stocks were streaked onto CDMPC  
144 agar plates and the *ccpA* locus was PCR amplified and resequenced from single colonies. The  
145 CcpA-Ile<sup>19</sup> variant emerged around 50 generations in the evolved strains and by generation  
146 150 was the dominant population in the chemostat (Supplementary Figure 11 and 12). The  
147 pattern of emergence was different for strain 309C4, with the emergence of a second variant,  
148 i.e. CcpA-Thr<sup>19</sup>. This variant was only detected after 250 generations and by 309 generations  
149 both CcpA variants existed in the population. Sequencing of numerous single colony isolates  
150 could not detect any wild type *ccpA* by 300 generations (data not shown).

151 Sequencing of single colony isolates from the C4 frozen stocks, revealed that the unique  
152 CcpA-Thr<sup>19</sup> variant is linked to the CodY-Phe<sup>214</sup>. At 309 generations the only combinations  
153 identified were CcpA-Ile<sup>19</sup> and CodY-Ile<sup>214</sup> (i.e. wild type CodY) and CcpA-Thr<sup>19</sup> and CodY-  
154 Phe<sup>214</sup>. Stocks resequenced from earlier in the evolution experiment also contained CcpA-  
155 Thr<sup>19</sup>, CodY-Ile<sup>214</sup> pairs, indicating that the *codY* mutations occurred in the unique CcpA-  
156 Thr<sup>19</sup> background.

157

### 158 ***Model description and parameter estimation***

159 The differential equations describing the rates of the change in the limiting nutrient  
160 concentration (*s*) and the biomass concentrations of the wild type (*w*) and the mutant (*m*) are,

161

$$\frac{ds}{dt}(t) = D(s_r - s(t)) - \frac{\mu_w}{Y_w} w(t) - \frac{\mu_m}{Y_m} m(t)$$
$$\frac{dw}{dt}(t) = (\mu_w - D)w(t)$$

$$\frac{dm}{dt}(t) = (\mu_m - D)m(t)$$

162 (1)

163 with:  $\mu_w = \mu_w^{max} \frac{s(t)}{K_w + s(t)}$ ,  $\mu_m = \mu_m^{max} \frac{s(t)}{K_m + s(t)}$ ,  $D$  as the dilution rate in  $h^{-1}$ ,  $\mu$  as the specific  
 164 growth rate in  $h^{-1}$ ,  $Y$  is the biomass yield in  $gDW.mM^{-1}$ ,  $\mu/Y$  as the specific nutrient uptake  
 165 rate in  $mM.gDW^{-1}.h^{-1}$ ,  $K$  as the Monod constant in  $mM$ ,  $s_r$  as the vessel concentration of the  
 166 limiting nutrient in  $mM$ ,  $s$  as the reactor concentration of the limiting nutrient in  $mM$ , and  $w$   
 167 and  $m$  as the biomass abundances in  $gDW.L^{-1}$ . The subscripts “w” and “m” indicate whether  
 168 the parameter concerns the wild type or the mutant. Alternatively, we could have taken the  
 169 OD to represent the biomass concentration, which we now take as  $gDW.L^{-1}$ .  
 170 Considering the experimental data it is more convenient to consider a dimensional time  
 171 defined as  $\tau = Dt$ , which is what we call generations. With this definition we obtain,

172

$$\begin{aligned} \frac{ds}{d\tau}(\tau) &= (s_r - s(\tau)) - \frac{\mu_w}{DY_w}w(\tau) - \frac{\mu_m}{DY_m}m(\tau) \\ \frac{dw}{d\tau}(\tau) &= \left(\frac{\mu_w}{D} - 1\right)w(\tau) \\ \frac{dm}{d\tau}(\tau) &= \left(\frac{\mu_m}{D} - 1\right)m(\tau) \end{aligned}$$

173 (2)

174 Since we are considering the fixation of the mutant, the initial conditions are given by the  
 175 steady state of wild type in the absence of the mutant:

176

$$\begin{aligned} w(0) &= Y_w \frac{D(K_w + s_r) - s_r\mu_w^{max}}{D - \mu_w^{max}} \\ s(0) &= \frac{DK_w}{\mu_w^{max} - D} \end{aligned}$$

177 (3)

178 Equations 2 and 3 were fitted against the experimental data. The results of the fit are shown  
 179 in Supplementary Table 1 and Supplementary Figure 13. These data indicate that observed  
 180 experimental data is in agreement with a basic chemostat model of the competitive growth of  
 181 two microorganisms. The values of the fitted parameters are not the only set of values that  
 182 describe the data. The data set is too small, and hence more variables would have to be  
 183 measured to obtain a unique estimation of parameter values.

184



186 Supplementary Table 7: Overview of parameters (fitted and experimental settings).

| Parameter                                        | Wild type (w) | Mutant (m) |
|--------------------------------------------------|---------------|------------|
| Yield on substrate, Y (g/mM)                     | 0.076         | 0.08       |
| Maximal growth, $\mu^{\max}$ (hr <sup>-1</sup> ) | 0.71          | 0.60       |
| Monod constant, K (mM)                           | 0.019         | 0.0033     |
| Experiment settings                              |               |            |
| Dilution rate, D (hr <sup>-1</sup> )             | 0.5           |            |
| Reservoir substrate concentration, Sr (mM)       | 25            |            |

187

## 188 **Supplementary materials and methods**

### 189 *Chemically defined medium for prolonged cultivations*

190 *Lactococcus lactis* subsp. *cremoris* MG1363 was grown in a chemically defined medium  
 191 developed for prolonged cultivation, CDMPC (Supplementary Table 1). The media consists  
 192 of a phosphate buffer at pH 6.5, supplemented with all 20 amino acids, the vitamins biotin,  
 193 DL-6,8-thioctic acid, D-pantothenic acid, nicotinic acid, pyridoxal hydrochloride, pyridoxine  
 194 hydrochloride and thiamine hydrochloride, and trace metals (NH<sub>4</sub>)<sub>6</sub>Mo<sub>7</sub>O<sub>24</sub>, CaCl<sub>2</sub>, CoSO<sub>4</sub>,  
 195 CuSO<sub>4</sub>, FeCl<sub>2</sub>, MgCl<sub>2</sub>, MnCl<sub>2</sub> and ZnSO<sub>4</sub>. The composition was based on the nutrient  
 196 requirements and biomass composition of *L. lactis* MG1363. The major differences compared  
 197 to previously published chemically defined media for *L. lactis* (Thomas et al. 1979; Poolman  
 198 and Konings 1988; Jensen and Hammer 1993) are (i) the removal of acetate and ammonium  
 199 ions; (ii) removal of redundant and/or unessential vitamins such as vitamin B<sub>12</sub>, or those that  
 200 could in addition impose (downstream) technical challenges such as riboflavin, which  
 201 fluoresces, and folate, which is difficult to dissolve and likely to precipitate during media  
 202 preparation; (iii) removal of trace elements that are likely to precipitate; (iv) removal of all  
 203 non-essential nucleic acid precursors; (v) adjustment of phosphate concentration such that it  
 204 provides enough buffering capacity to enable growth until OD<sub>600</sub> of 0.8, while not inhibiting  
 205 growth rate; (vi) adjustment of amino acid composition to 2.5-fold the requirement for 1  
 206 gDW·L<sup>-1</sup> according to the biomass composition (Oliveira et al. 2005); and (vii)  
 207 implementation of a new protocol that reduces variations between media batches by avoiding

208 precipitation and heat or light degradation. Glucose was added to a final concentration of 25  
209 mM and cultivation was performed under an anaerobic headspace.

210

### 211 *Standardized cryopreservation and inoculation procedure*

212 The outcome of laboratory evolution experiments can be greatly affected by the composition  
213 of the population used to seed each of the prolonged cultivations. In order to minimize  
214 background genetic variation and variations in pre-culture condition, we developed a  
215 standardized cryopreservation and inoculation procedure inspired by industrial procedures to  
216 create, maintain and distribute single strain isolate stocks (Figure 1, main text). All the  
217 prolonged cultivations in this study were carried out from the working stocks generated via  
218 this procedure.

### 219 *Single colony isolation and parent-stock preparation*

220 A glycerol stock of *L. lactis* MG1363 (provided by Jan Kok, University of Groningen, the  
221 Netherlands) was used to inoculate M17 enriched with 0.5% glucose (GM17). This culture  
222 was streaked out from GM17 onto CDMPC agar plates (CDMPCA) and incubated for 48  
223 hours at 30° C. An isolated colony was transferred to CDMPC and incubated for 24 hours at  
224 30° C. A 1% inoculum of the freshly grown culture was used to inoculate CDMPC. After 5  
225 consecutive transfers under the same conditions and using 1% inoculum to seed subsequent  
226 cultures, the resulting culture was streaked out in CDMPCA and incubated for 24 hours at 30°  
227 C. An isolated colony was transferred to 7.5 ml of CDMPC and incubated for 24 hours at 30°  
228 C reaching a final OD<sub>600</sub> of 1.165. “Parent-stocks” were then prepared by adding 3.75 ml of  
229 sterile 60% glycerol and dividing the mixture in 11 aliquots of 1 ml in self-standing Nunc™  
230 Cryotubes (366656), kept at -80° C for at least for 48 hours before reviving or moving.

### 231 *Working-stock preparation*

232 One of the 11 aliquots of the parent-stock was used to inoculate 199 ml of CDMPC (0.5%  
233 inoculum) and incubated for 20 hours at 30° C, until the culture was full-grown. 100 ml of  
234 sterile 60% glycerol was then added, resulting in 300 ml of 20% glycerol stock of *L. lactis*  
235 G0 in CDMPC. “Working-stocks” were then prepared by dividing the latter in 960 aliquots of  
236 0.3 ml in 1.2 ml sterile polypropylene cluster tubes 96-well racked from Corning  
237 Incorporated Costar® (4413). These were capped using 8-Cap Strips from Corning  
238 Incorporated Costar® (4418) and separated into individual vials using a slightly heated  
239 bistoury and ruler. Working-stocks were stored at – 80° C for at least 24 hours before  
240 reviving or moving.

### 241 *Standardized inoculation procedure*

242 A working-stock was revived by thawing a 0.3 ml aliquot of 20% glycerol stock of *L. lactis*  
243 G0 in CDMPC and used to inoculate 44.7 ml of CDMPC (0.67% inoculum). This culture was  
244 incubated for 16 hours at 30° C, which corresponds to the time at which the culture reaches  
245 early stationary phase ( $OD_{600} \sim 1.00 \pm 0.15$ ). This freshly-grown culture cultivated in a  
246 standardized fashion and seeded from a controlled inoculum, was then used directly as the  
247 inoculum of downstream cultivations and assays (chemostats, batch cultures, etc.) performed  
248 by different experimentalists across several laboratories committed to working in a  
249 standardized way.

#### 250 *Moving and storage of cryopreserved stocks*

251 The 11 aliquots of 20% glycerol stock of *L. lactis* G0 in CDMPC (parent-stock) were divided  
252 amongst the laboratories of the University of Amsterdam, VU University Amsterdam,  
253 Groningen University and Research Center and Wageningen University, preserved in  
254 different -80° C freezers within these institutes. The 960 aliquots of 20% glycerol stock of *L.*  
255 *lactis* G0 in CDMPC (working-stock) were divided amongst all the collaborators involved in  
256 standardized systems biology studies using *L. lactis* G0 as the model organism. Both the  
257 parent- and working-stocks were kept frozen at all times and transported accordingly.

258

#### 259 *Experimental set up*

260 *L. lactis* MG1363 was cultivated in 4 chemostats run in parallel at 30°C at the following  
261 dilution rates: 0.5 h<sup>-1</sup> for a total of 309 consecutive generations; 0.6 h<sup>-1</sup> for a total of 700  
262 consecutive generations. Our design makes use of bioreactor lids that can fit any vessel with a  
263 GL45 thread. It allows for two connectors to be inserted at variable depths, used here to  
264 control the working volume and sampling. These custom made bioreactors were set-up to  
265 make four parallel chemostat cultivations controlling stirring, temperature, pH, flow, volume  
266 and gas composition. The newly developed caps are versatile and can be readily adapted to  
267 other types of controlled cultivation, such as fed-batch, pH-auxostats, turbidostats,  
268 retentostats, amongst others. Culture samples can be withdrawn directly through a port  
269 present in the centre of the cultivation vessel or by rerouting the effluent using acetal quick-  
270 disconnect couplings (Masterflex via Cole Parmer, Schiedam, Netherlands) Throughout the  
271 prolonged cultivations samples were collected from the effluent to leave the cultivation  
272 undisturbed.

273 For each set of parallel chemostats, temperature was controlled using a water bath (Thermo  
274 Haake DC30-W13/B via Cole Parmer, Schiedam, Netherlands) set to 30°C. Even stirring was

275 ensured using an immersible stirrer unit connected to a remote controller (Cole Parmer,  
276 Schiedam, Netherlands) set to ~300 rpm. Mixing was tested by pulsing with glucose to a final  
277 concentration of 60 mM and taking samples at three different positions of the bioreactor.  
278 Minor differences were observed between samples harvested at different time points (<5%),  
279 and at small-time scales (<10 seconds) the solution appeared equilibrated. pH was measured  
280 separately in each culture using a 120 mm gel-filled pH-sensor (Applikon, Schiedam,  
281 Netherlands) connected to an Alpha-pH800 (Eutech, Thermoscientific) that controlled a 1  
282 rpm L/S pump drive equipped with an Easy-Load II pump head (Masterflex via Cole Parmer,  
283 Schiedam, Netherlands) that titrated the culture with a solution of 2.5 M NaOH. The culture  
284 was continuously flushed through the headspace with a mixture of 5% CO<sub>2</sub> and 95% N<sub>2</sub> at a  
285 flow rate of 10 culture volumes per hour (i.e. 600 ml/h). The dilution rates of the different  
286 prolonged cultivations carried out in this study were set by controlling the flow of CDMPC  
287 using a variable speed L/S pump drive equipped with four Easy-Load II pump heads  
288 (Masterflex via Cole Parmer, Schiedam, Netherlands). All parallel cultivations were supplied  
289 with CDMPC from the same medium vessel.

290 A small sample was removed every 10-15 generations and stored at -80 °C in 20% (v/v)  
291 glycerol. In addition, the effluent was collected for optical density at 600 nm (OD<sub>600</sub>)  
292 measurements and HPLC analysis. For subsequent studies, the glycerol stocks were used. 5  
293 ml of fresh CDMPC was inoculated from the frozen glycerol stocks and grown for 16 h at  
294 30°C. The overnight culture was subsequently diluted to a starting OD<sub>600</sub> of 0.025-0.050 in  
295 either CDMPC or M17 medium (Oxoid, Basingstoke, United Kingdom) supplemented with  
296 0.5% (w/v) glucose or other carbon sources as indicated.

### 297 ***Pyrosequencing***

298 Frozen glycerol stocks served as template material for PCR reactions. The PyroMark  
299 platform from QIAGEN was used for pyrosequencing and reactions were performed as per  
300 manufacturer's instructions. The region surrounding the point mutations was amplified and  
301 biotinylated with the use of a biotinylated reverse primer. To detect the ratio of SNPs in the  
302 population, single stranded primers were designed so as to terminate before the codon  
303 containing the mutation.

### 304 ***Recombinant DNA methods***

305 For cloning purposes, *Escherichia coli* XL1 blue was used. *ccpA* from the evolved *L. lactis*  
306 strains was cloned into the pQE30 plasmid essentially as described to create pQE30ccpA  
307 (Kowalczyk and Bardowski 2003). This allowed for the placement of 6 X His at the 5'-end of

308 the *ccpA* gene. The *ccpA* gene was PCR amplified from genomic DNA from the single  
309 colony isolates from strains Genr0, 309C1, 309C2 and 309C4. *E. coli* XL1blue harbouring  
310 pQE30*ccpA* was used for overproduction of CcpA by IPTG induction. CcpA was purified  
311 using Ni-NTA resin (Qiagen, Germantown, MD, USA) as previously described (Kowalczyk  
312 and Bardowski 2003). The protein concentration was determined with the DC Protein assay  
313 kit (Bio-Rad, Hercules, CA, USA) using BSA as a standard.

314

### 315 ***Protein identification by liquid chromatography-mass spectrometry***

316 The samples were separated by SDS-PAGE and stained with Bio-Safe Coomassie (Bio-Rad,  
317 Hercules, CA, USA). In-gel tryptic digestion was followed by peptide extraction and LC-  
318 MS/MS as described in detail in Drop *et al.*, 2011. The MS raw data was submitted to Mascot  
319 (Version 2.1, Matrix Science, London, UK) and searched against the *L. lactis* MG1363  
320 proteome. Protein identifications were based on at least 2 unique peptides identified by  
321 MS/MS, each with a confidence of identification probability of at least 95%.

322

### 323 ***Molecular dynamics simulations***

324 The free energy of mutating the protein was calculated while protein was bound to DNA and  
325 free in solvent and the relative binding free energy of the mutated protein compared to the  
326 wild type was obtained by subtracting the free energy of the former from the latter  
327 (Supplementary Figure 9).

328 The free energy of mutating the protein was calculated using a topology with two side chains  
329 at residue 19. The two side chains did not interact with each other and the mutation was done  
330 in three steps. In the first step, the charges of the wild type methionine side chain were  
331 uncoupled from rest of the system while the mutated side chain was completely non-  
332 interacting. In the second step, the Lennard-Jones interactions of methionine side chain were  
333 uncoupled while at the same time the Lennard-Jones interactions of the mutated side chain  
334 were coupled to the side chain. In the third step, the charges of the mutated side chain were  
335 coupled to the system while the methionine side chain was completely non-interacting. The  
336 first and third steps were performed using 5 simulations with different lambda values while  
337 the second step used 11 lambda values. Soft-core interactions were used in the second step  
338 with soft-core parameter  $\alpha$  set to 0.5. An error estimate is calculated from block averaging



339 each 1 ns of the simulations and using the standard deviation of the obtained values as the  
340 error.

341 In the simulations, the protein monomers can move relatively freely in solution when DNA is  
342 not present and sampling of conformations becomes an issue. To ensure that the  
343 conformations sampled would be similar for all CcpA variants, rotational and translational  
344 constraints were used to prevent the monomers from moving with reference to each other as  
345 described in (50).

346 A 2 fs time step was used with all bonds constrained using the LINCS algorithm (Hess et al.  
347 1997). Simulations were run with periodic boundary conditions in all directions. Non-bonded  
348 interactions were treated as recommended in (Bjerkmar et al. 2010). Electrostatics were  
349 calculated using PME (Essmann et al. 1995) with a 1.2 nm cut-off. Lennard-Jones  
350 interactions were switched off between 1.0 and 1.2 nm and dispersion correction was applied  
351 to both energy and pressure. The protein-DNA system and the solvent were separately  
352 coupled to a 298 K heat bath using the velocity rescaling thermostat (Bussi et al. 2007) with  
353  $\tau_T = 0.5$  ps. A 1 bar pressure was kept using an isotropic Parrinello-Rahman (Parrinello and  
354 Rahman 1981) pressure coupling with  $\tau_p = 4.0$  ps and  $4.5e-5 \text{ bar}^{-1}$  compressibility. Each  
355 system was energy minimized and briefly equilibrated with position restraints before being  
356 equilibrated for 10 ns. After equilibration each simulation was run for 20 ns except the  
357 systems with deviant *cre* sites that were simulated for 10 ns.

358 All simulations were run using the Gromacs 4.5.5 (Hess et al. 2008) simulation package. The  
359 protein and DNA were modelled with CHARMM27 force field with CMAP corrections  
360 (Foloppe and MacKerell Jr. 2000; MacKerell et al. 2004) together with the original TIP3P  
361 water model (Jorgensen et al. 1983) as implemented in Gromacs 4.5.5.

362 Free energy changes were calculated from simulations using the Bennett acceptance ratio  
363 method (Bennett 1976) with the *g\_bar* tool in Gromacs. Gromacs is a free software package  
364 available at <http://www.gromacs.org/>.

365

### 366 *Enzyme reactions*

367 L-lactate dehydrogenase (L-LDH) was purchased from Sigma-Aldrich (St. Louis, MO, USA).  
368 L-LDH was added to culture supernatant to a final concentration of 0.2U/ml, NADH was  
369 added to 2 mM and the reaction incubated for 15 minutes at 25°C. X-prolyl dipeptidyl

370 aminopeptidase (PepX) activity was measured using the chromogenic substrate Ala-Pro-*p*-  
371 nitroanilid (Bachem Feinchemicalien AG, Bubendorf, Switzerland) as described (Buist et al.  
372 1998).

373  $\beta$ -galactosidase assays were performed as previously described (Israelsen et al. 1995;  
374 Kloosterman et al. 2006).

375

376 *Miscellaneous*

377 Oligopeptides were from JPT Peptide Technologies GmbH (Berlin, Germany).

378

379

## 380 **Supplementary References**

- 381 Ashkenazy H, Erez E, Martz E, Pupko T, Ben-Tal N. 2010. ConSurf 2010: calculating  
382 evolutionary conservation in sequence and structure of proteins and nucleic acids.  
383 Nucleic Acids Res. 38:W529–W533.
- 384 Bennett CH. 1976. Efficient estimation of free energy differences from Monte Carlo data. J.  
385 Comput. Phys. 22:245–268.
- 386 Bjelkmar P, Larsson P, Cuendet MA, Hess B, Lindahl E. 2010. Implementation of the  
387 CHARMM Force Field in GROMACS: Analysis of Protein Stability Effects from  
388 Correction Maps, Virtual Interaction Sites, and Water Models. J. Chem. Theory  
389 Comput. 6:459–466.
- 390 Brooijmans RJW, Poolman B, Schuurman-Wolters GK, de Vos WM, Hugenholtz J. 2007.  
391 Generation of a membrane potential by *Lactococcus lactis* through aerobic electron  
392 transport. J. Bacteriol. 189:5203–5209.
- 393 Buist G, Kok J, Eenhouts K, Dabrowska M, Venema G, Haandrikman AJ. 1995. Molecular  
394 Cloning and Nucleotide Sequence of the Gene Encoding the Major Peptidoglycan  
395 Hydrolase of *Lactococcus lactis*, a Muramidase Needed for Cell Separation. J Bacteriol  
396 177:1554–1563.
- 397 Buist G, Venema G, Kok J. 1998. Autolysis of *Lactococcus lactis* Is Influenced by  
398 Proteolysis. J. Bacteriol. 180:5947–5953.
- 399 Bussi G, Donadio D, Parrinello M. 2007. Canonical sampling through velocity rescaling. J.  
400 Chem. Phys. 126:14101.
- 401 Cesselin D, Lamberet G, Duwat P, Sourice S, Vido K, Gaudu P, Loir YLE, Violet F, Cesselin  
402 B, Le Loir Y, et al. 2001. Respiration Capacity of the Fermenting Bacterium  
403 *Lactococcus lactis* and Its Positive Effects on Growth and Survival. J. Bacteriol.  
404 183:4509–4516.
- 405 Deutscher J, Francke C, Postma PW. 2006. How phosphotransferase system-related protein  
406 phosphorylation regulates carbohydrate metabolism in bacteria. Microbiol. Mol. Biol.  
407 Rev. 70:939–1031.
- 408 van Dijk M, Wassenaar TA, Bonvin AMJJ. 2012. A Flexible, Grid-Enabled Web Portal for  
409 GROMACS Molecular Dynamics Simulations. J. Chem. Theory Comput. 8:3463–3472.
- 410 Essmann U, Perera L, Berkowitz ML, Darden T, Lee H, Pedersen LG. 1995. A smooth  
411 particle mesh Ewald method. J. Chem. Phys. 103:8577–8593.
- 412 Foloppe N, MacKerell Jr. AD. 2000. All-atom empirical force field for nucleic acids: I.  
413 Parameter optimization based on small molecule and condensed phase macromolecular  
414 target data. J. Comput. Chem. 21:86–104.
- 415 Hess B, Bekker H, Berendsen HJC, Fraaije JGEM. 1997. LINCS: A Linear Constraint Solver  
416 for Molecular Simulations. J Comput Chem 18:1463–1472.
- 417 Hess B, Kutzner C, van der Spoel D, Lindahl E. 2008. GROMACS 4: Algorithms for Highly  
418 Efficient, Load-Balanced, and Scalable Molecular Simulation. J. Chem. Theory Comput.  
419 4:435–447.
- 420 Israelsen H, Madsen SM, Vrang A, Hansen EB, Johansen E. 1995. Cloning and partial  
421 characterization of regulated promoters from *Lactococcus lactis* Tn917-lacZ integrants  
422 with the new promoter probe vector, pAK80. Appl. Environ. Microbiol. 61:2540–2547.
- 423 Jensen PR, Hammer K. 1993. Minimal Requirements for Exponential Growth of *Lactococcus*

- 424 *lactis*. Appl. Environ. Microbiol. 59:4363–4366.
- 425 Jorgensen WL, Chandrasekhar J, Madura JD, Impey RW, Klein ML. 1983. Comparison of  
426 simple potential functions for simulating liquid water. J. Chem. Phys. 79:926–935.
- 427 Kloosterman TG, Hendriksen WT, Bijlsma JJE, Bootsma HJ, van Hijum SAFT, Kok J,  
428 Hermans PWM, Kuipers OP. 2006. Regulation of Glutamine and Glutamate Metabolism  
429 by GlnR and GlnA in *Streptococcus pneumoniae*. J. Biol. Chem. 281:25097–25109.
- 430 Kowalczyk M, Bardowski J. 2003. Overproduction and purification of the CcpA protein from  
431 *Lactococcus lactis*. Acta Biochim Pol. 50:455–459.
- 432 Kuipers OP, de Jong A, Baerends RJS, van Hijum SAFT, Zomer AL, Karsens HA, den  
433 Hengst CD, Kramer NE, Buist G, Kok J. 2002. Transcriptome analysis and related  
434 databases of *Lactococcus lactis*. Antonie Van Leeuwenhoek 82:113–122.
- 435 Levdikov VM, Blagova E, Joseph P, Sonenshein AL, Wilkinson AJ. 2006. The Structure of  
436 CodY, a GTP- and Isoleucine-responsive Regulator of Stationary Phase and Virulence in  
437 Gram-positive Bacteria. J. Biol. Chem. 281:11366–11373.
- 438 Loll B, Kowalczyk M, Alings C, Chieduch A, Bardowski J, Saenger W, Biesiadka J. 2007.  
439 Structure of the transcription regulator CcpA from *Lactococcus lactis*. Acta Crystallogr.  
440 Sect. D 63:431–436.
- 441 MacKerell AD, Feig M, Brooks CL. 2004. Improved Treatment of the Protein Backbone in  
442 Empirical Force Fields. J. Am. Chem. Soc. 126:698–699.
- 443 Oliveira A, Nielsen J, Förster J. 2005. Modeling *Lactococcus lactis* using a genome-scale  
444 flux model. BMC Microbiol. 15:1–15.
- 445 Parrinello M, Rahman A. 1981. Polymorphic transitions in single crystals: A new molecular  
446 dynamics method. J. Appl. Phys. 52:7182–7190.
- 447 Poolman B, Konings WN. 1988. Relation of growth of *Streptococcus lactis* and  
448 *Streptococcus cremoris* to amino acid transport. J Bacteriol 170:700–707.
- 449 Sanz Y, Lanfermeijer FC, Hellendoorn M, Kok J, Konings WN, Poolman B. 2004. Two  
450 homologous oligopeptide binding protein genes (*oppA*) in *Lactococcus lactis* *opp2*  
451 [corrected]. Int. J. Food Microbiol. 97:9–15.
- 452 Schumacher MA, Sprehe M, Bartholomae M, Hillen W, Brennan RG. 2011. Structures of  
453 carbon catabolite protein A-(HPr-Ser46-P) bound to diverse catabolite response element  
454 sites reveal the basis for high-affinity binding to degenerate DNA operators. Nucleic  
455 Acids Res. 39:2931–2942.
- 456 Thomas TD, Ellwood DC, Longyear VM. 1979. Change from homo- to heterolactic  
457 fermentation by *Streptococcus lactis* resulting from glucose limitation in anaerobic  
458 chemostat cultures. J. Bacteriol. 138:109–117.
- 459 Tynkkynen S, Buist G, Kunji E, Kok J, Poolman B, Venema G, Haandrikman A. 1993.  
460 Genetic and biochemical characterization of the oligopeptide transport system of  
461 *Lactococcus lactis*. J. Bacteriol. 175:7523–7532.

462

463

464

465 **Supplementary Figures Legends**

466

467

468 **Supplementary Figure 1.** Strain characteristics during the evolution experiments at D of  
469 0.5h<sup>-1</sup> and of the resulting evolved strains. For each of the chemostats (labeled C1 to C4) the  
470 cell counts (A) and organic acids (B) were measured. The values for lactate (red), formate  
471 (dark blue), acetone (blue) and ethanol (light blue) are shown. The levels of pyruvate  
472 increased in all the chemostats during the evolution experiment (C). The evolved strains were  
473 revived in batch culture and the growth characteristics determined (D).

474

475

476

477 **Supplementary Figure 2.** Transcriptional fidelity in evolved strains is comparable to the  
478 original ones. Strains were grown in CDMPC and harvested at the mid-exponential phase of  
479 growth. Data are averages of three measurements with the error bars indicating the standard  
480 deviation. Specific  $\beta$ -galactosidase activity was measured in the strains indicated using pPG6  
481 (P. Gamba and J.W. Veening, unpublished data), which contains a premature stop codon at  
482 Glu13.

483

484

485 **Supplementary Figure 3.** Altered gene expression in evolved strains is focused on transport  
486 pathways. Genes were considered to be significantly changes with a Bayes p-value score of  
487 less than 0.05 and a pfp value of less than 0.05. Genes found to change significantly in the  
488 evolved strains were grouped into functional classes. The p-value is the summation of the  
489 hypergeometrical distribution and p-values less than 0.05 were considered to be significant.  
490 (a) Over-represented KEGG BRITE classes found. (b) Over-represented regulons found. (c)  
491 The expression of genes involved in glucose uptake in *L. lactis* MG1363 were significantly  
492 changed in the evolved strains. Highlighted in green are genes that were up-regulated and in  
493 red for down-regulated. Gene expression changes not meeting the significance cut-off values  
494 are highlighted in grey. (d) Kinetic parameters of glucose transport in Genr0 and the evolved  
495 stains were determined in cells grown to exponential phase in CDMPC. Glucose transport  
496 was assayed with the use of [14-C]-labeled glucose. Values of three independent  
497 experiments were averaged and are reported  $\pm$ SD. Vmax and Km were determined using  
498 glucose concentrations from 1.2 to 200  $\mu$ M.

499

500

501 **Supplementary Figure 4.** (a) Rate of utilization of carbon sources present in biolog plates.  
502 Cells were grown in CDMPC until mid-exponential phase, washed in CDMPC without  
503 glucose and resuspended in CDMPC without glucose containing 5 µg/ml chloramphenicol to  
504 an OD600 of 2. 150 µl of the culture suspension was added to each of the wells of the  
505 biology plate and acid formation was monitored at OD485 for 4 hours. The maximum rates  
506 of utilization were calculated and the averages of two separate experiments are shown. Only  
507 substrates used by at least one strains are shown. (b) Substrates not utilized under the  
508 conditions tested.

509

510

511 **Supplementary Figure 5.** Growth of the evolved strains is inhibited but not abolished when  
512 leucine is supplied as a nonapeptide. (a) Differentially expressed genes involved in  
513 oligopeptide uptake in *L. lactis* MG1363. Significant changes were considered for genes with  
514 a Bayes p-value score of less than 0.05 and a pfp value of less than 0.05 and are highlighted in  
515 green for upregulated genes and in red for down regulated genes. Gene expression changes  
516 not meeting the significance cut off values are highlighted in grey. (b) Strains were grown in  
517 CDMPC or in CDMPC without leucine but with a leucine-containing nonapeptide. Growth  
518 was followed for 16 hours. Shown are Gen0 (black lines) and 309F4 (grey lines) grown in  
519 CDMPC (solid lines) or CDMPC with leucine-containing peptide (dashed lines). (c) The  
520 difference in the final OD600 values reached after growth for 16 hours are shown for all  
521 strains. Shown are the averages between three separate experiments with the standard  
522 deviation indicated.

523



524

525 **Supplementary Figure 6.** Evolved strains are less prone to lysis on prolonged cultivation  
526 than the original strain. (a) Expression changes for *acmA* are shown. Differentially expressed  
527 genes involved in aerobic respiration in *L. lactis* MG1363. Significant changes were  
528 considered for genes with a Bayes p-value score of less than 0.05 and a pfp value of less than  
529 0.05 and are highlighted in red for down regulated genes. (b) PepX activity was measured in  
530 the culture supernatant at the time points indicated. Activity was measured using the  
531 chromogenic substrate Ala-Pro-p-nitroanilid and the colour change was monitored at OD405.  
532 One representative experiment is shown. (c) Evolved strains sediment during growth.  
533 Overnight cultures of Gen0 and 309C1 in CDMPC are shown. (d) Sedimentation is caused  
534 by the formation of long cell chains. Typical pictures are shown for Gen0 and 309C1 grown  
535 for 16 hours in CDMPC. The cells were visualized using a Zeiss light microscope and a Zeiss  
536 digital camera. Magnification,  $\times 1\ 000$ .

537

538

539 **Supplementary Figure 7.** Evolved cells are no longer able to respire when heme is added to  
540 the medium. (a) No biomass increase is observed in the evolved strains when heme is added  
541 to the growth medium. Strains were grown in GM17 medium for 16 hours under aerobic  
542 conditions with and without heme which was added to 2  $\mu\text{g/ml}$ . Shown are the average  
543 values from three separate experiments with the standard deviation indicated. (b)  
544 Differentially expressed genes involved in aerobic respiration in *L. lactis* MG1363.  
545 Significant changes were considered for genes with a Bayes p-value score of less than 0.05  
546 and a pfp value of less than 0.05 and are highlighted in red for down regulated genes. Gene  
547 expression changes not meeting the significance cut off values are highlighted in grey.

548

549

550 **Supplementary Figure 8.** The DNA binding domain of CcpA is highly conserved. (a)  
551 Using consurf db (Ashkenazy et al. 2010) and the *B. subtilis* CcpA-HPr complex bound to a  
552 synthetic cre site (3OQN) as a starting structure, the level of amino acid sequence  
553 conservation among LacI transcriptional regulators was analysed. One molecule of CcpA is  
554 colored according to the level of conservation within the LacI family of transcriptional  
555 regulators, HPr and the DNA are colored yellow. Dark purple indicates 100% conservation  
556 while blue indicates extensive sequence variation. (b) View of the DNA-binding domain  
557 with the side chain of Met19 (numbering according to *L. lactis* MG1363) is shown.

558

559

560 **Supplementary Figure 9.** The thermodynamic cycle to calculate the relative binding free  
561 energies. The wild type protein is shown in yellow and the mutated protein in red. Note that  
562 while the color of the whole protein is different only a single residue is changed in both  
563 monomers of the mutated protein. The relative binding free energy is  $\Delta G1 + \Delta G3$  which,  
564 based on the cycle, is equal to  $-(\Delta G2 + \Delta G4)$ . The inset highlights the DNA binding domain  
565 of CcpA, with the methionine-19 position in red, and isoleucine at the same position in  
566 yellow.

567

568 **Supplementary Figure 10.** Binding of CcpA to cre sites in vitro. The binding of CcpA-  
569 Met19 and CppA-Ile19 was tested with DNA sequences identified as cre sites upstream of  
570 *ptcB* and *mtlD* as well as a perfect cre site referred to as syn. As a control the CodY  
571 recognition site upstream of *oppD* was also tested.

572

573

574

575 **Supplementary Figure 11.** *ccpA* accumulates the Met19 to Ile early in evolution experiment  
576 and quickly takes over the population. The abundance of the three CcpA species is shown.  
577 Indicated are the averages of two pyrosequencing reactions and in the case of strain 309C4,  
578 the abundance of the Thr mutation was verified by Sanger sequencing. The PCR was  
579 performed from the frozen stocks sampled during the continuous culture process. In green is  
580 indicated the prevalence of the Ile mutant, in blue wild type CcpA and in grey the Thr  
581 mutant. (a) 309C1, (b) 309C2, (c) 309C3, (d) 309C4.

582

583

584 **Supplementary Figure 12.** Abundance of nucleotides at third position in the Met19 codon.  
585 Indicated are the averages of two pyrosequencing reactions. The PCR was performed from  
586 the frozen stocks sampled during the continuous culture process. In green is indicated the  
587 prevalence of adenosine, in red thymine, in blue cytosine and in black guanine. The average  
588 standard deviation between the separate reactions was 4.4. (a) 309C1, (b) 309C2, (c) 309C3,  
589 (d) 309C4.

590

591

592 **Supplementary Figure 13. Overview of the fitting results.** A & B. The fitted model (eq. 2  
593 and 3) and the experimental data. C. Predicted dynamics of the concentration of the limiting  
594 nutrient in the chemostat. The mutant wins the competition with the wild type because it can  
595 grow at a specific growth rate equal to  $D$  at a lower limiting nutrient concentration than the  
596 wild type. D. Influence of parameter values on the objective, indicating that all the parameter  
597 values reach their optimal values (reported in Supplementary Table 1) when the fit objective  
598 reaches its minimal value. E. Illustration that the Monod constant of the wild type and the  
599 mutant cannot be independently estimated; i.e. the same objective value is obtained for  
600 different values of those parameters. The plot suggests that the ratio of  $K_w/K_m$  can be fitted  
601 but not their individual values.

602

603

604

605

606

607

608

609

610

611



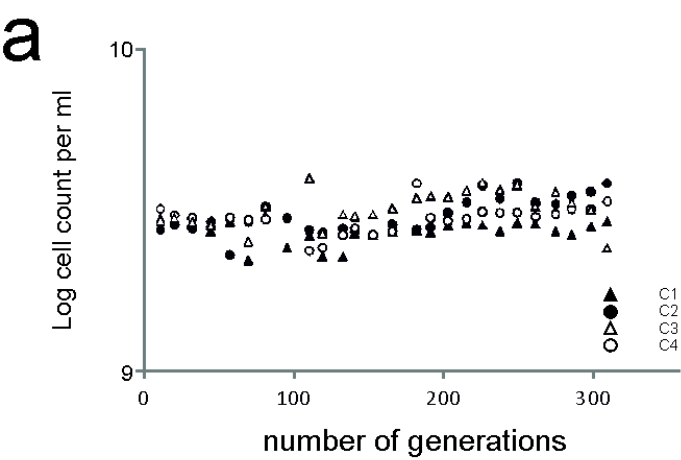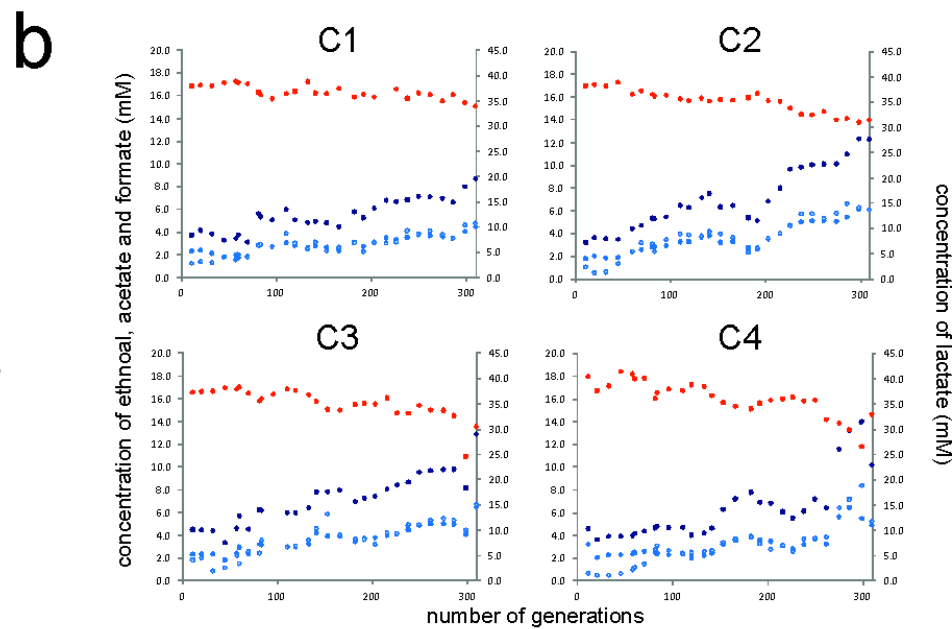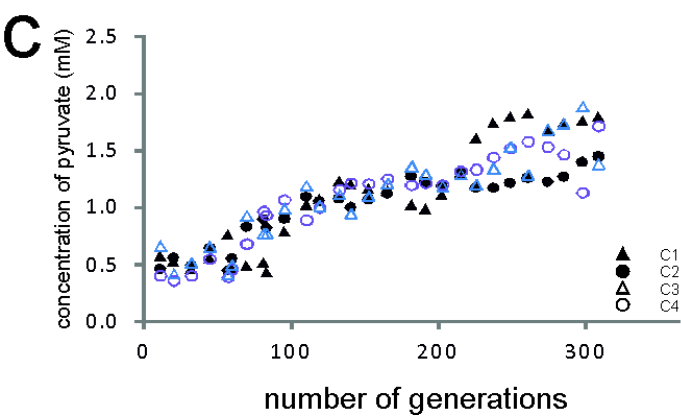

**d**

|       | average $\mu_{max}$ ( $h^{-1}$ ) | lag phase (min) | average biomass yield compared to GenrO |
|-------|----------------------------------|-----------------|-----------------------------------------|
| GenrO | 0.703                            | 240             | N/A                                     |
| 309C1 | 0.586                            | 270             | 1.13                                    |
| 309C2 | 0.430                            | 345             | 0.9                                     |
| 309C3 | 0.572                            | 276             | 1.12                                    |
| 309C4 | 0.534                            | 285             | 1.15                                    |

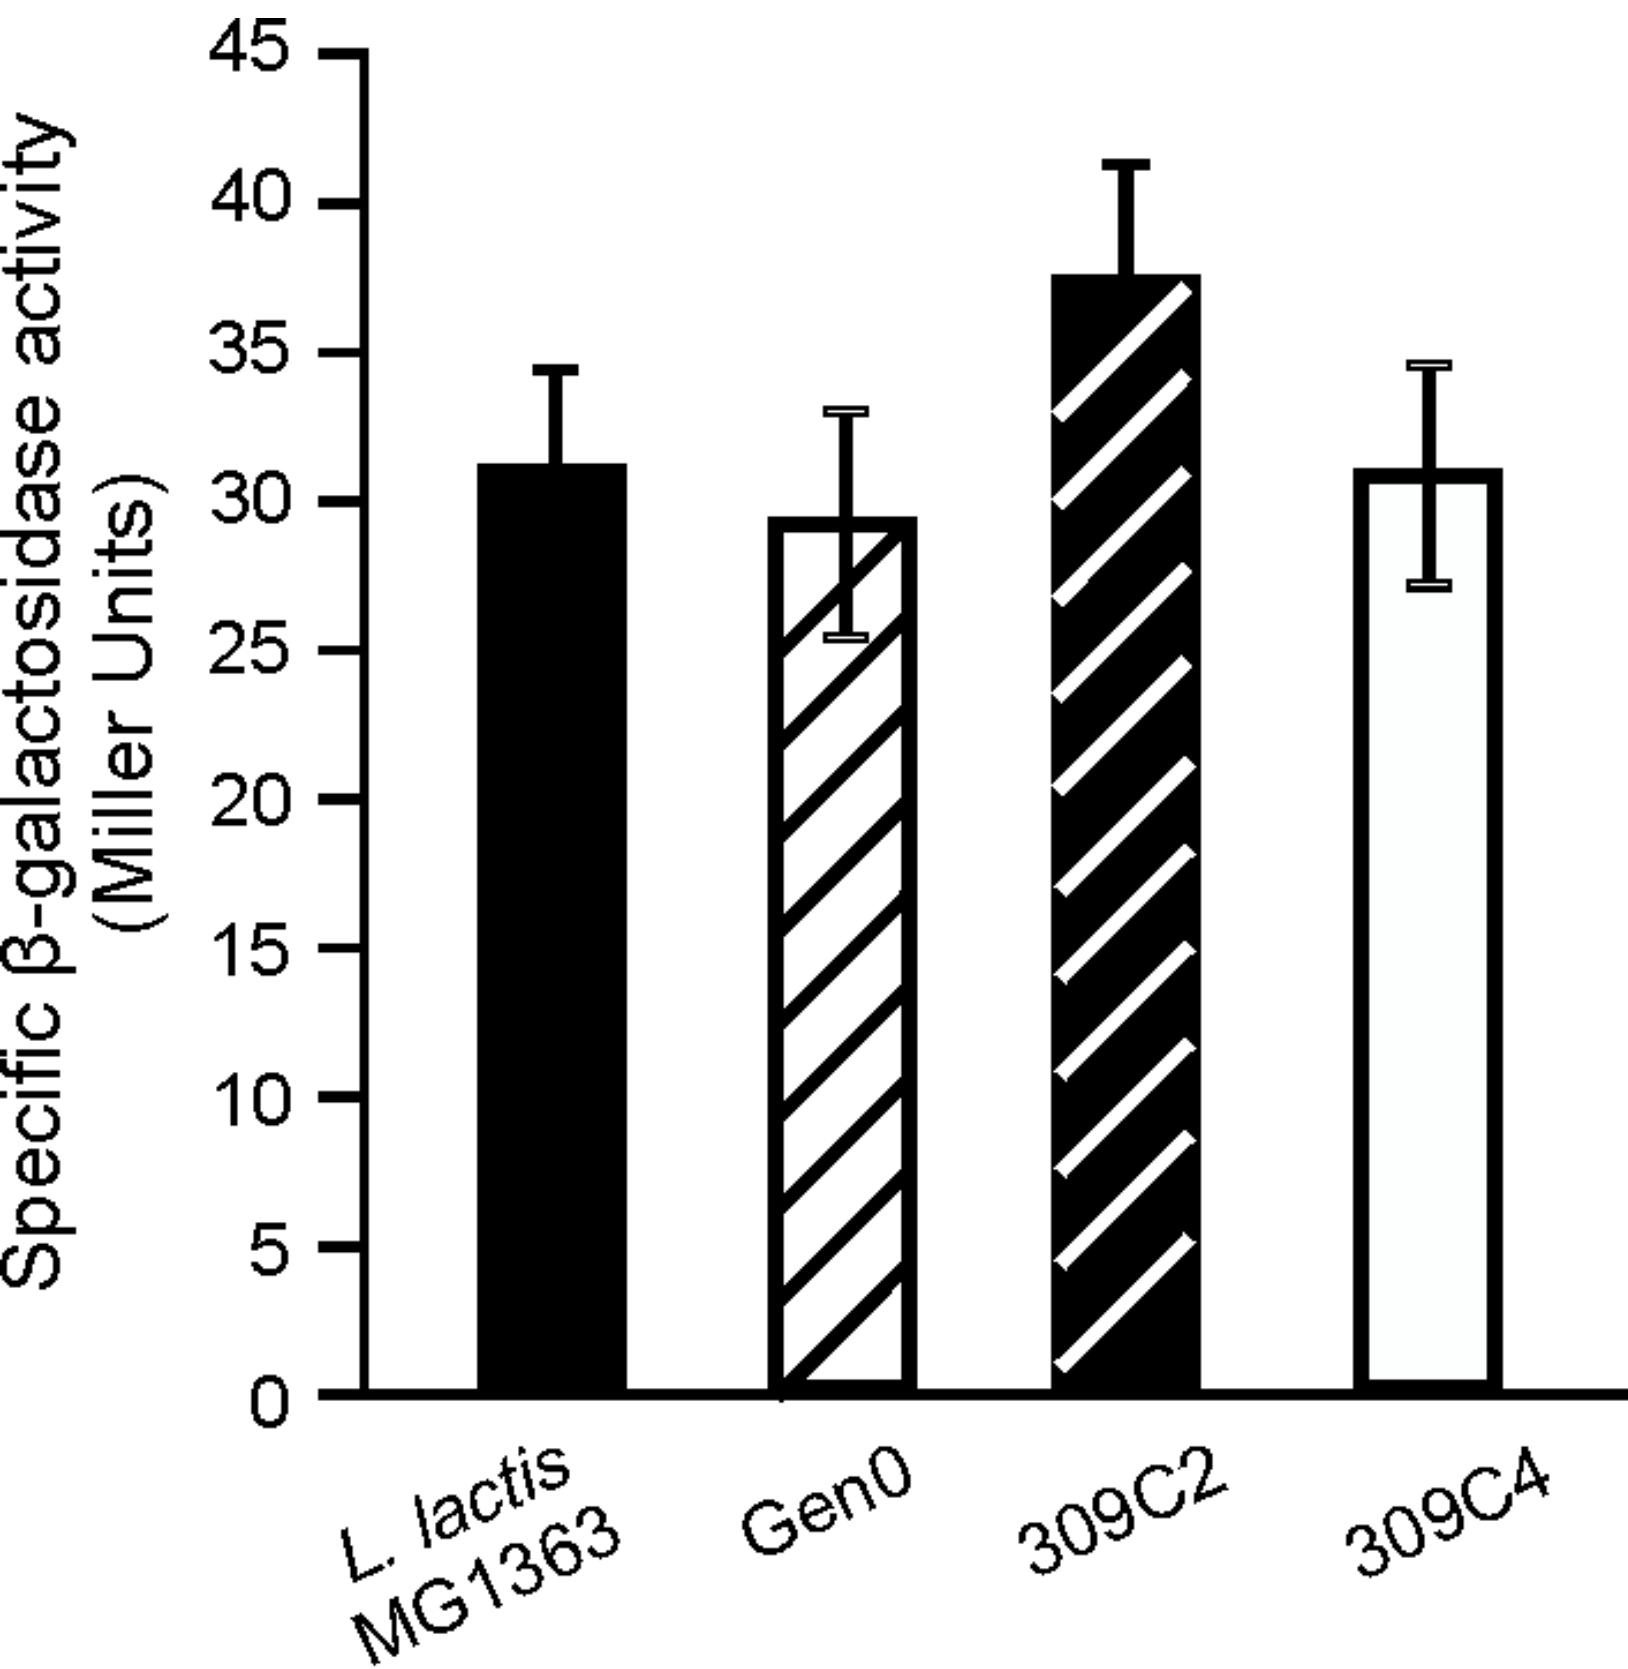

a

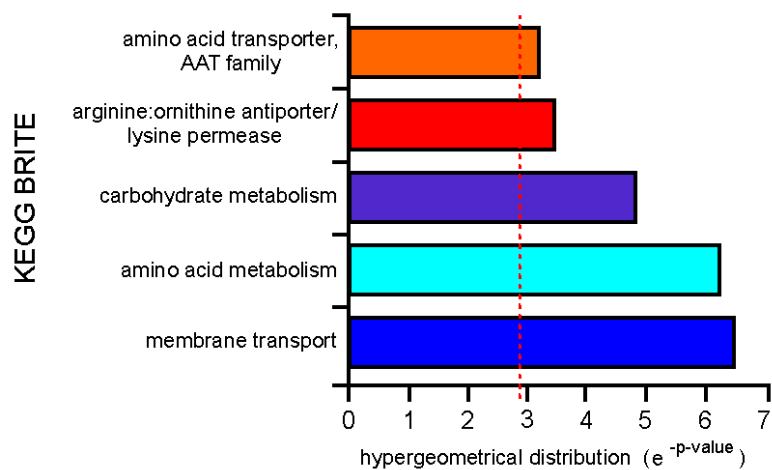

b

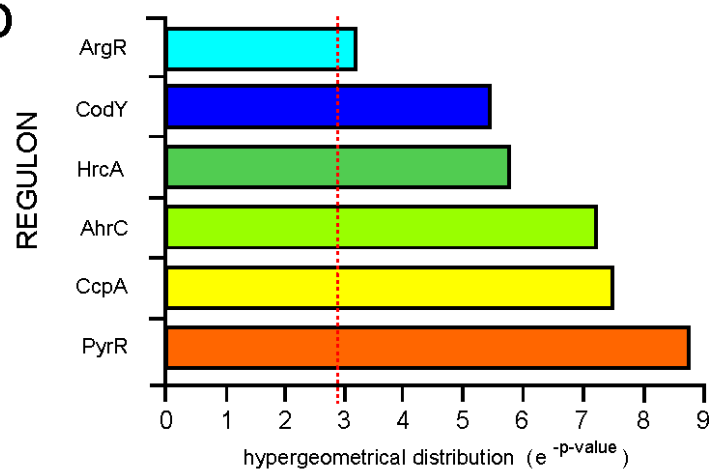

c

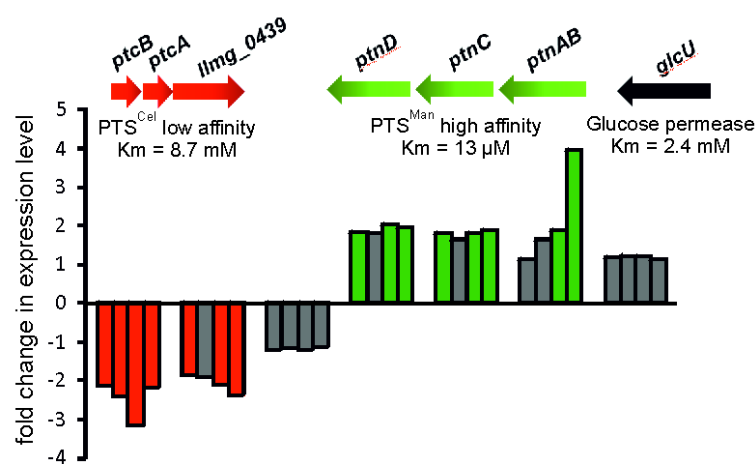

d

| Strain | Glucose uptake and metabolism   |                         |
|--------|---------------------------------|-------------------------|
|        | Vmax<br>(nmol/min x mg protein) | Km<br>( $\mu\text{M}$ ) |
| Genr0  | 176.0 $\pm$ 13.1                | 21.0 $\pm$ 0.8          |
| 309C1  | 484.7 $\pm$ 37.2                | 22.2 $\pm$ 0.7          |
| 309C2  | 488.9 $\pm$ 45.4                | 21.5 $\pm$ 1.2          |
| 309C3  | 507.9 $\pm$ 48.3                | 21.8 $\pm$ 1.7          |
| 309C4  | 419.6 $\pm$ 49.4                | 21.4 $\pm$ 1.6          |

a

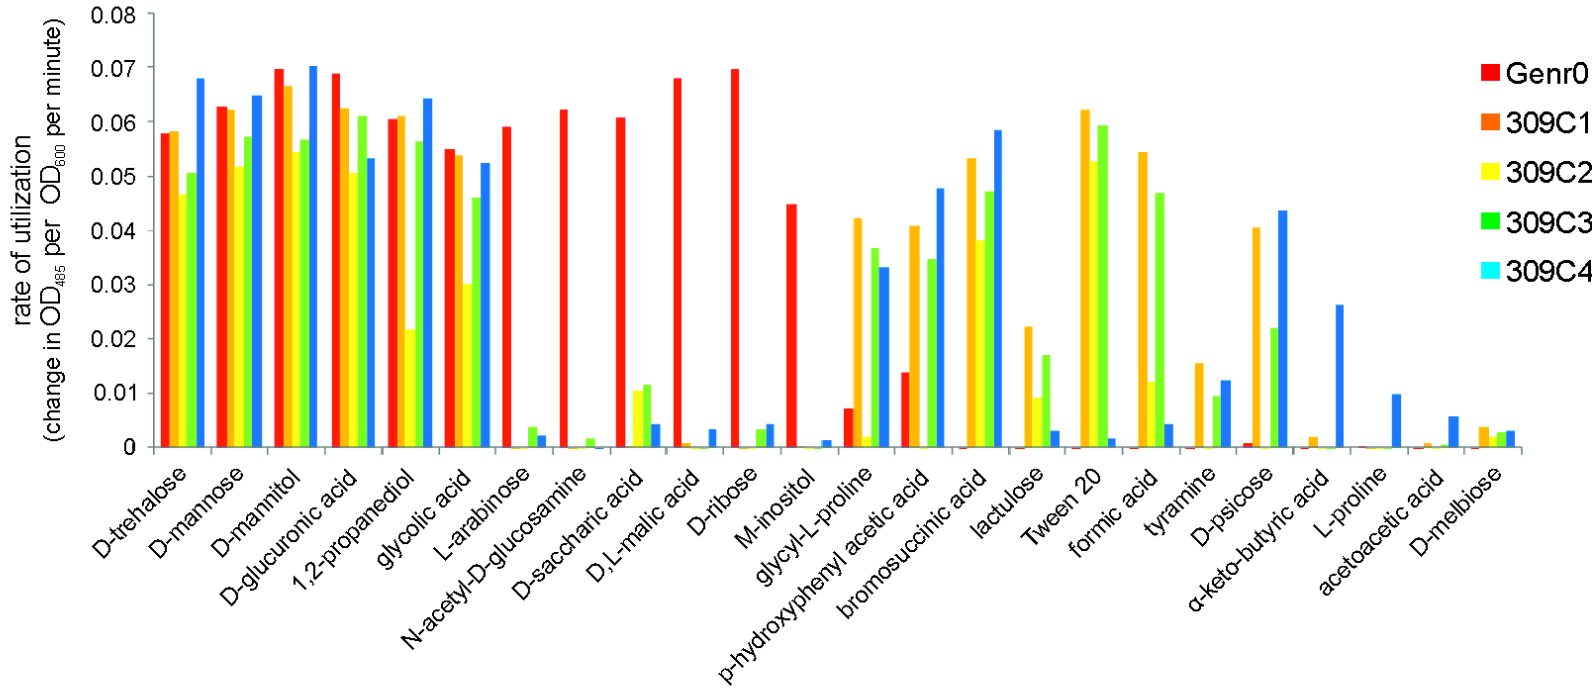

b

|                                   |                             |                       |                             |                              |                          |
|-----------------------------------|-----------------------------|-----------------------|-----------------------------|------------------------------|--------------------------|
| 2-aminoethanol                    | β-methyl-D-glucoside        | D-glucosaminic acid   | glycyl-L-aspartic acid      | L-lactic acid                | mucic acid               |
| 2-deoxy adenosine                 | citric acid                 | D-glucose-1-phosphate | glycyl-L-glutamic acid      | L-malic acid                 | N-acetyl-β-D-mannosamine |
| acetic acid                       | D,L-α-glycerol-phosphate    | D-glucose-6-phosphate | glyoxylic acid              | L-proline                    | phenylethylamine         |
| acetoacetic acid                  | D-alanine                   | D-malic acid          | inosine                     | L-senne                      | propionic acid           |
| adenosine                         | D-aspartic acid             | D-serine              | L-alanine                   | L-threonine                  | pyruvic acid             |
| adonitol                          | D-cellubiose                | D-sorbitol            | L-alanyl-glycine            | L-xylose                     | succinic acid            |
| α-D-glucose                       | D-fructose                  | D-threonine           | L-asparagine                | maltose                      | sucrose                  |
| α-D-lactose                       | D-fructose-6-phosphate      | Dulcitol              | L-aspartic acid             | maltotriose                  | thymidine                |
| α-hydroxy butyric acid            | D-galactonic acid-γ-lactone | D-xylene              | L-fucose                    | methyl pyruvate              | tricarballic acid        |
| α-hydroxy glutaric acid-γ-lactone | D-galactose                 | fumaric acid          | L-galactonic acid-γ-lactone | m-hydroxy phenyl acetic acid | Tween 40                 |
| α-keto-glutaric acid              | D-galaturonic acid          | glucuronamide         | L-glutamic acid             | mono methyl succinate        | Tween 80                 |
| α-methyl-D-galactosidase          | D-gluconic acid             | glycerol              | L-glutamine                 | M-tartaric acid              | undine                   |

**a**

|              | 309C1 | 309C2 | 309C3 | 309C4 |
|--------------|-------|-------|-------|-------|
| <i>oppA</i>  | -2.51 | -1.77 | -6.78 | -8.47 |
| <i>oppB</i>  | -2.07 | -1.55 | -4.28 | -6.55 |
| <i>oppC</i>  | -2.81 | -1.89 | -6.62 | -8.29 |
| <i>oppD</i>  | -1.93 | -1.84 | -4.48 | -9.83 |
| <i>oppF</i>  | -2.10 | -1.79 | -6.51 | -6.93 |
| <i>oppA2</i> | -1.75 | 1.18  | -1.68 | 4.13  |
| <i>oppB2</i> | -1.35 | 1.55  | -1.12 | 5.53  |
| <i>oppC2</i> | 1.08  | 2.05  | 1.06  | 2.28  |

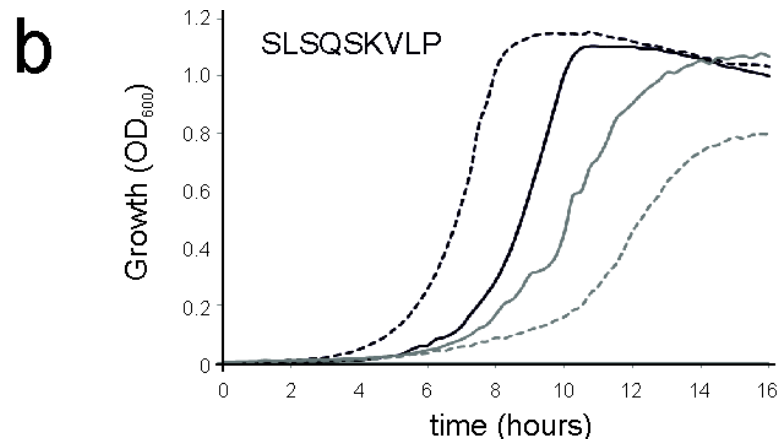

**c**

| Strain | Difference in maximum OD <sub>600</sub> reached with oligopeptide (%) |
|--------|-----------------------------------------------------------------------|
| Genr0  | 103.4 ± 1.65                                                          |
| 309C1  | 75.08 ± 6.68                                                          |
| 309C2  | 103.2 ± 12.49                                                         |
| 309C3  | 77.72 ± 0.08                                                          |
| 309C4  | 74.18 ± 3.85                                                          |

**a**

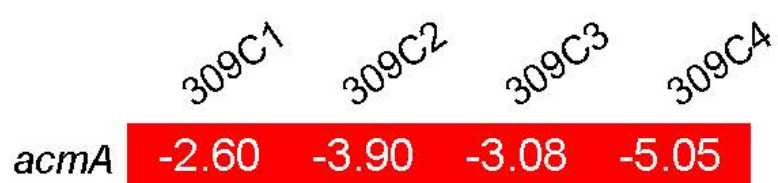

**b**

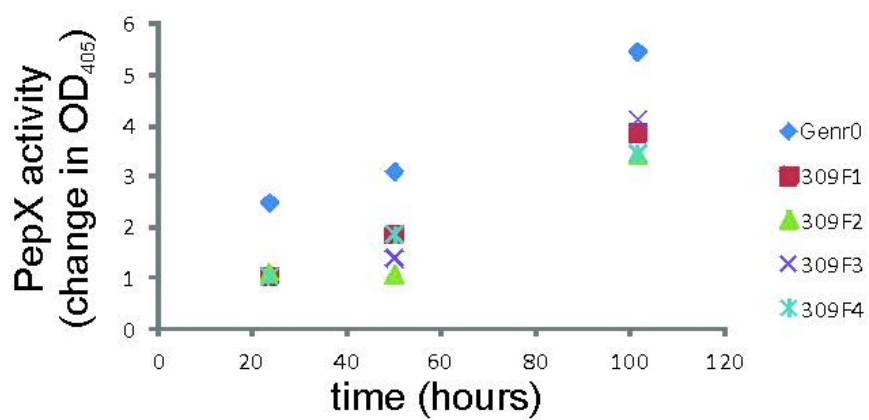

**c**

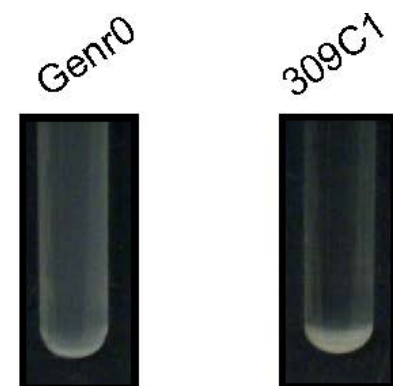

**d**

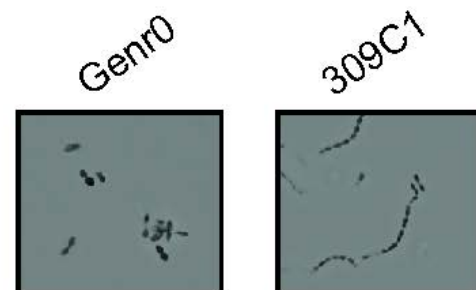

**a**

| strain       | GM17         | GM17 + heme  | ratio |
|--------------|--------------|--------------|-------|
| <b>Genr0</b> | 2.48 ± 0.005 | 4.22 ± 0.16  | 1.70  |
| <b>309F1</b> | 2.13 ± 0.04  | 2.32 ± 0.025 | 1.09  |
| <b>309F2</b> | 2.24 ± 0.015 | 2.42 ± 0.02  | 1.08  |
| <b>309F3</b> | 2.49 ± 0.03  | 2.68 ± 0.025 | 1.08  |
| <b>309F4</b> | 2.08 ± 0.005 | 2.38 ± 0.005 | 1.14  |

**b**

|             | 309C1        | 309C2 | 309C3        | 309C4        |
|-------------|--------------|-------|--------------|--------------|
| <i>noxA</i> | 1.00         | -1.14 | -1.72        | <b>-2.05</b> |
| <i>noxB</i> | -1.82        | -1.53 | -1.02        | <b>-2.18</b> |
| <i>noxE</i> | <b>-2.44</b> | -1.93 | <b>-2.99</b> | -1.30        |
| <i>hemK</i> | -1.72        | -1.86 | <b>-2.02</b> | -1.22        |

a

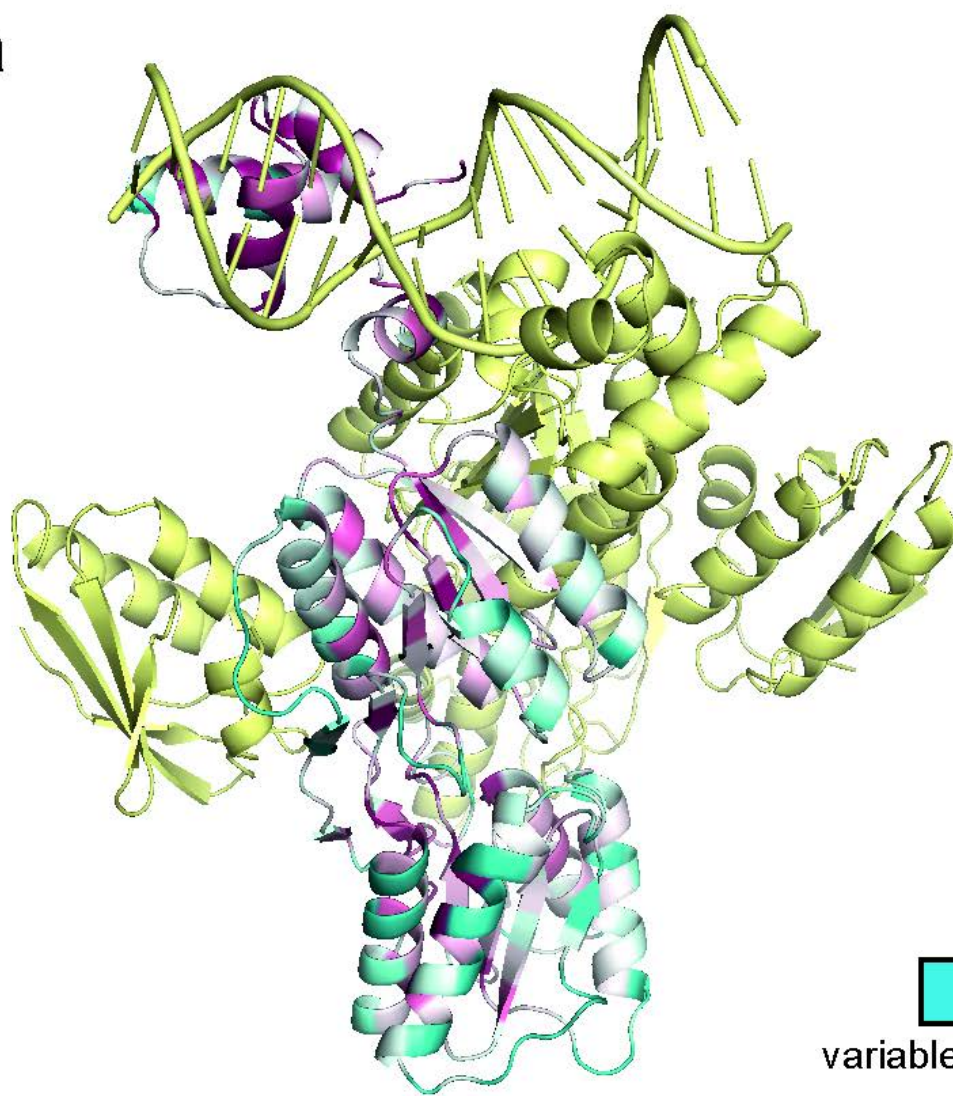

b

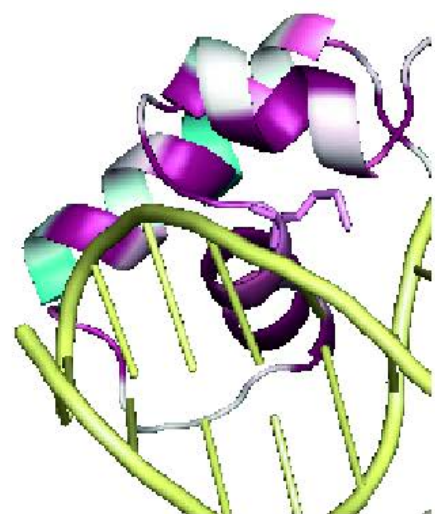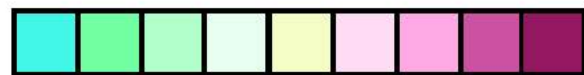

variable

conserved



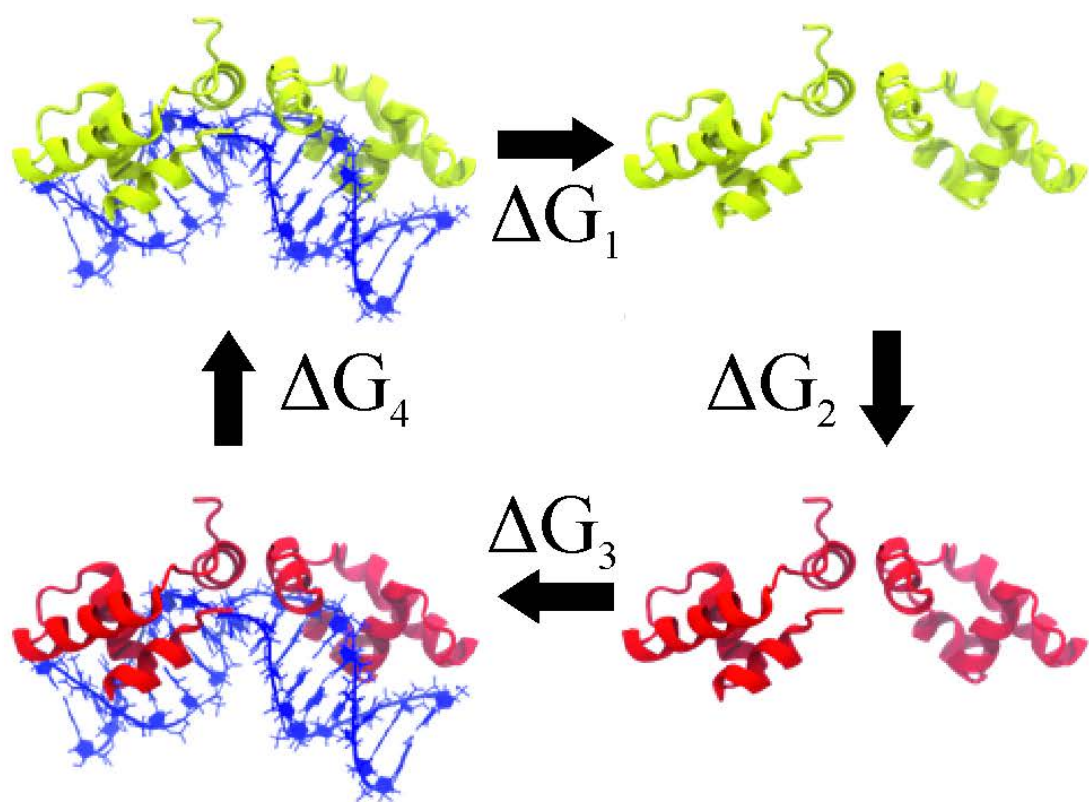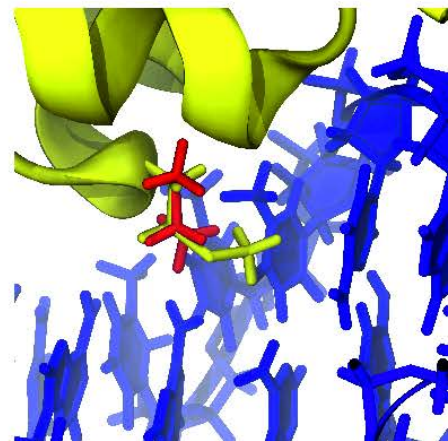

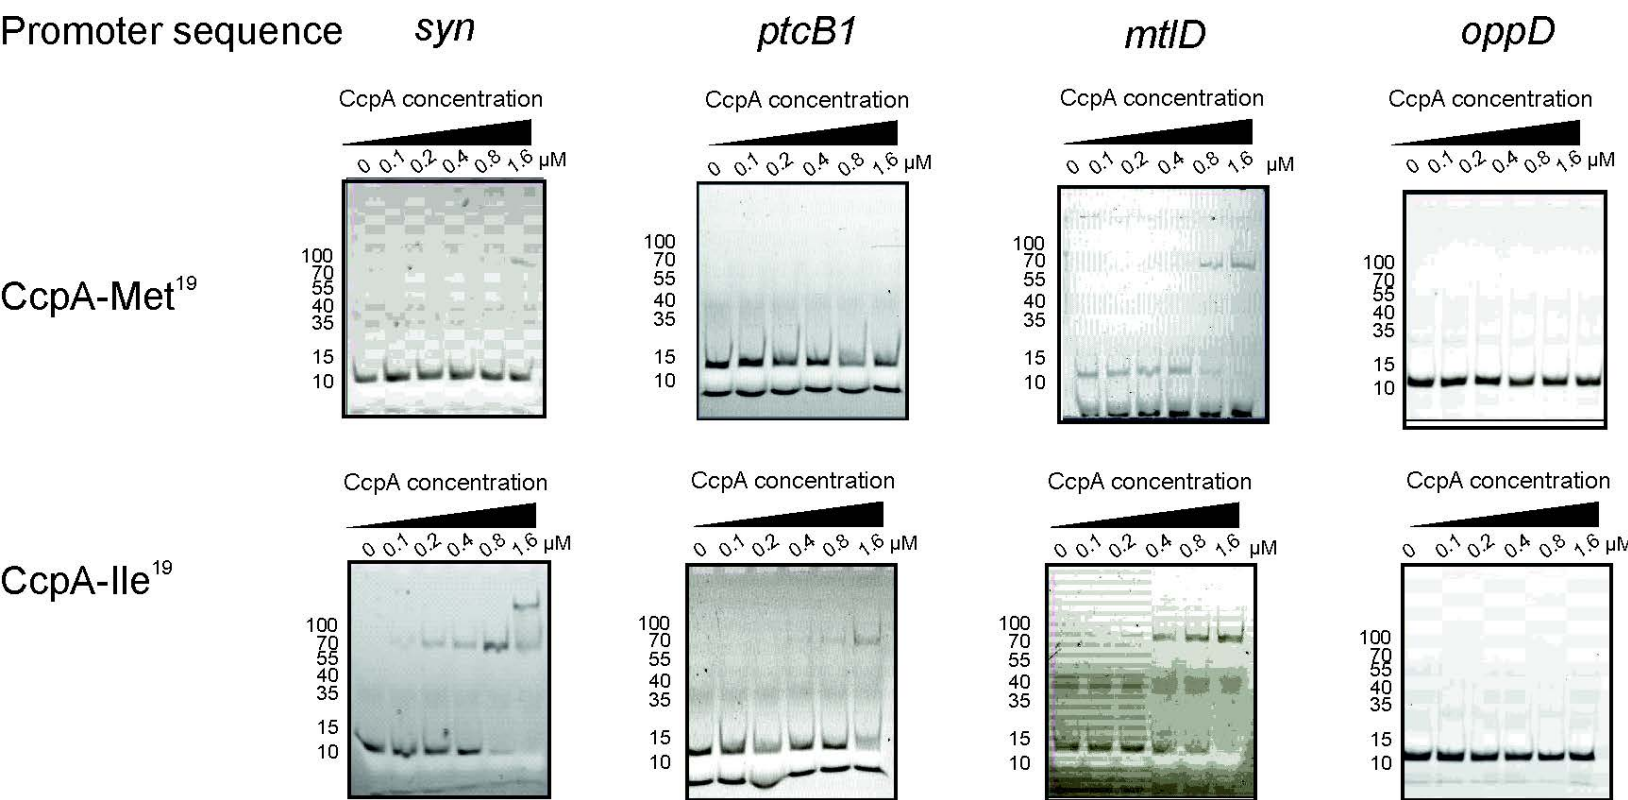

a

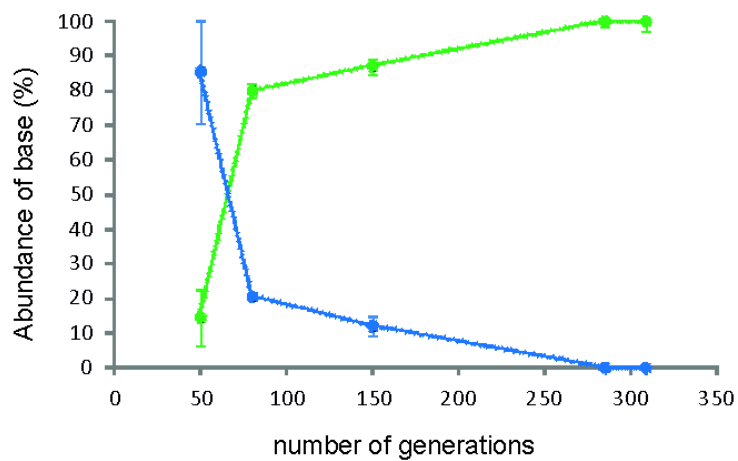

b

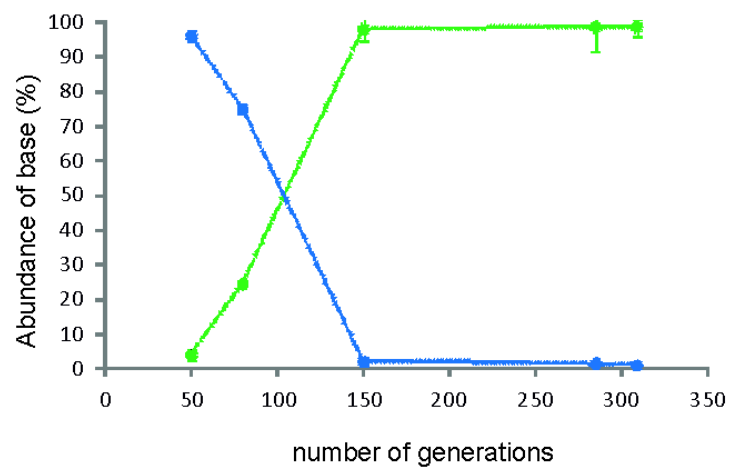

c

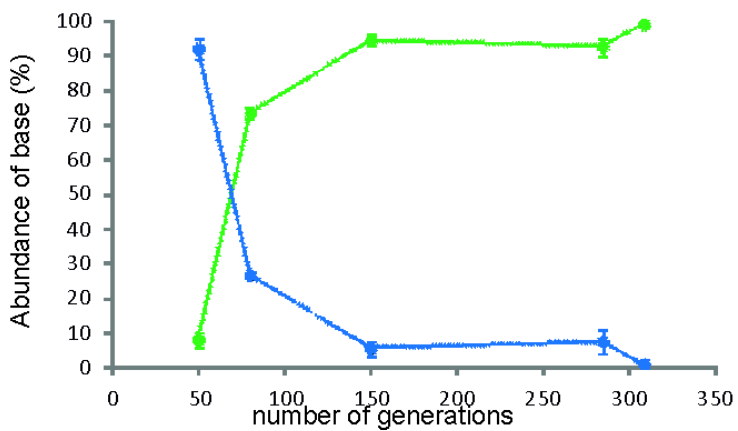

d

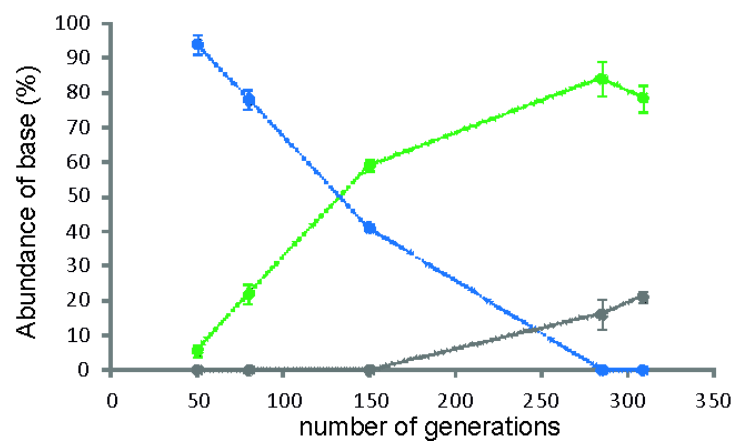

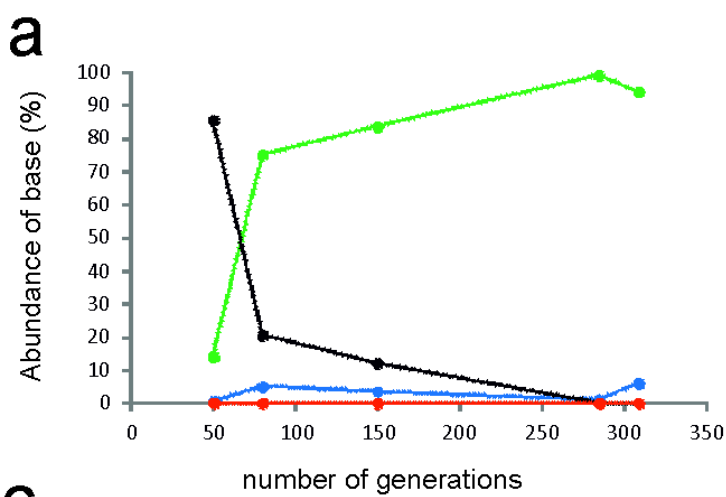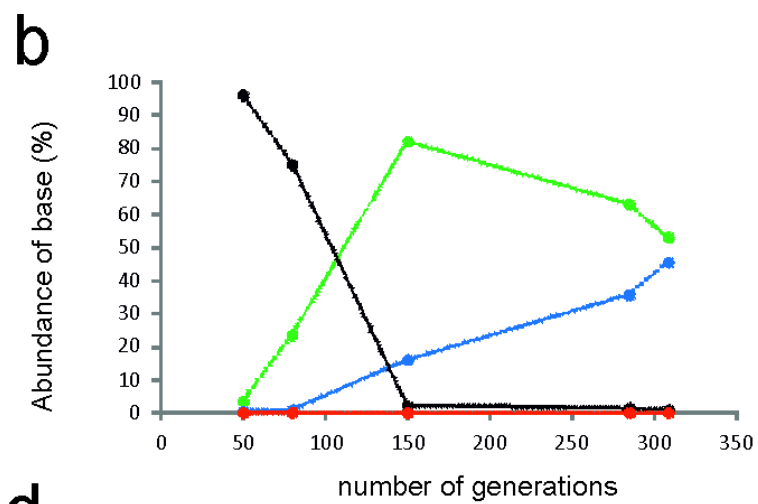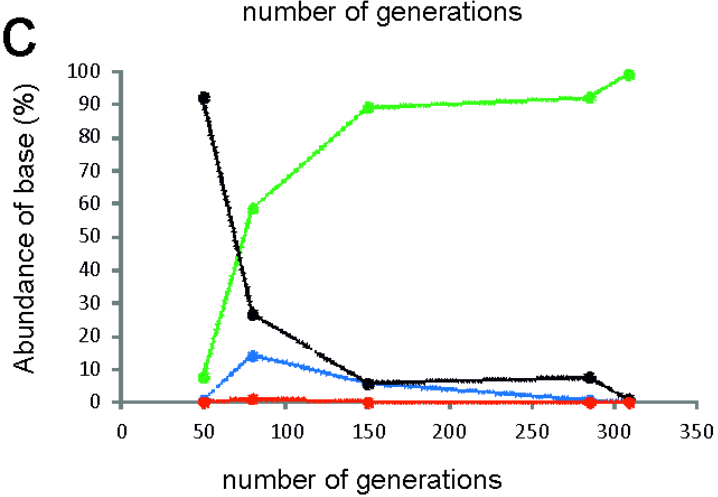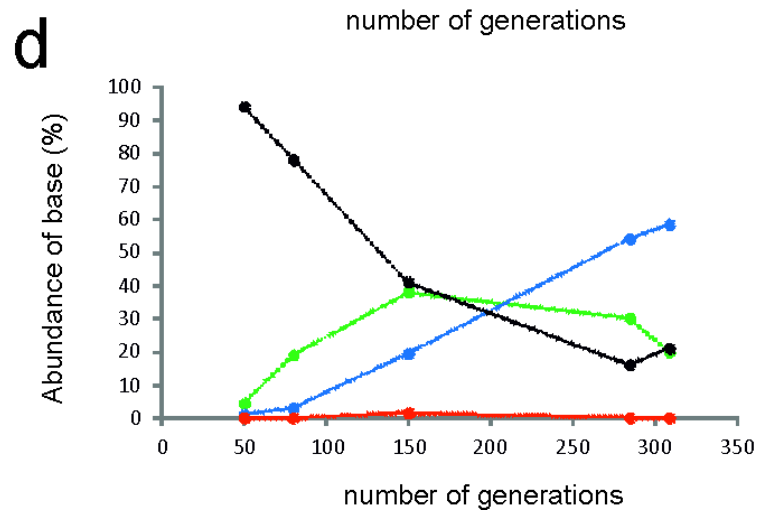

**A**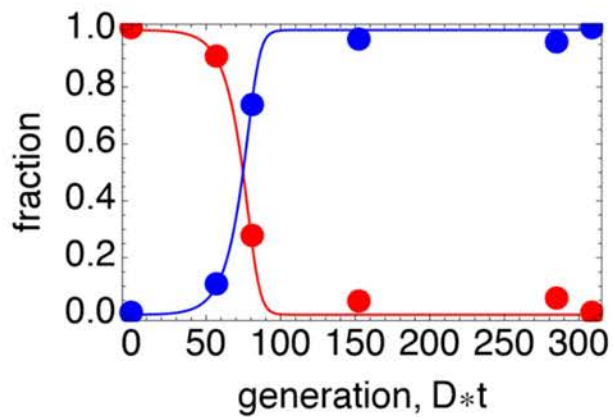**B**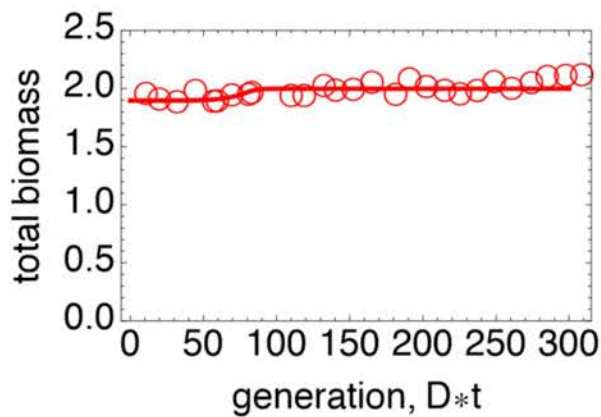**C**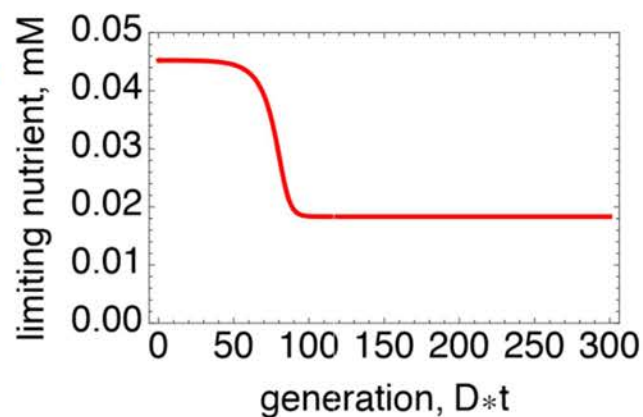**D**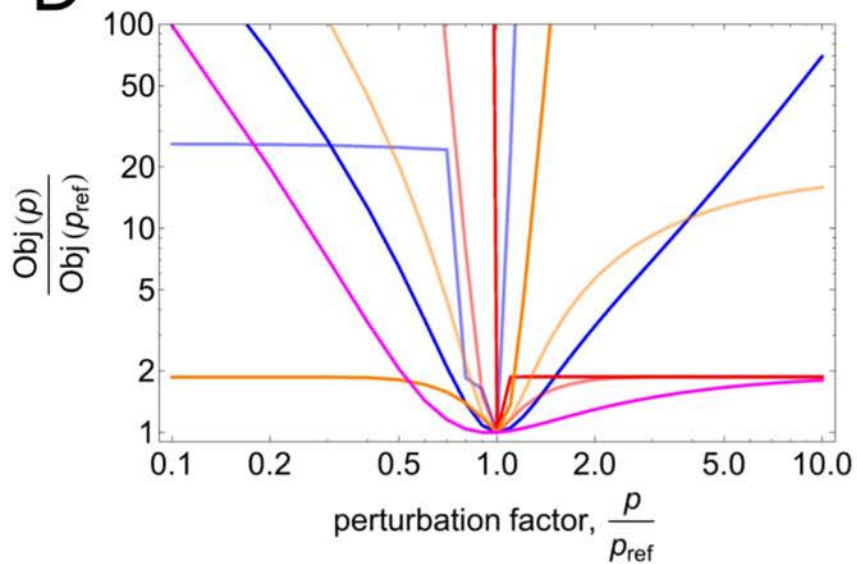**E**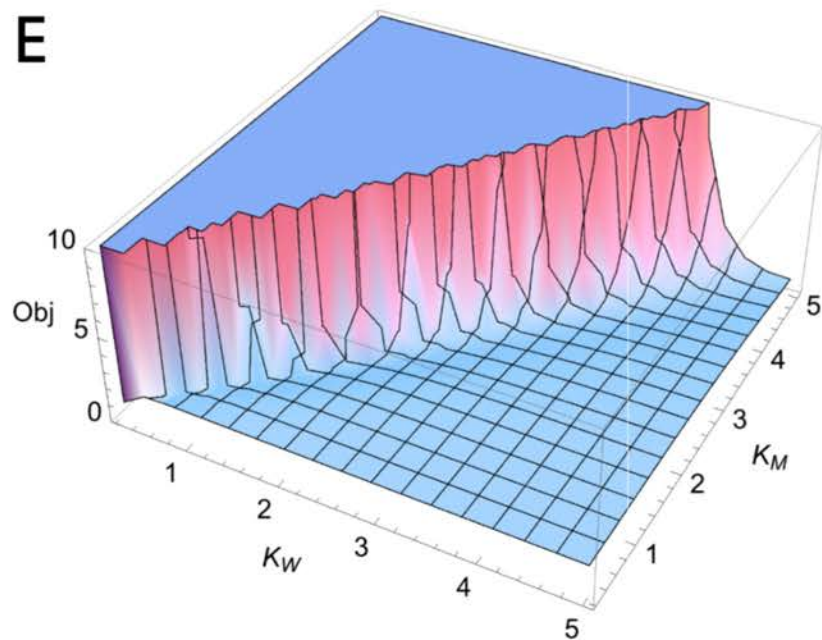

Source: http://biorxiv.org/content/10.1101/147926v1.full.pdf
